1 **Drug connectivity mapping and functional analysis reveals therapeutic small**  
2 **molecules that differentially modulate myelination**

3

4 <sup>1</sup>Pieropan F<sup>†</sup>, <sup>1,2</sup>Rivera AD<sup>†</sup>, <sup>3</sup>Williams G, <sup>5</sup>Calzolari F, <sup>1</sup>Butt AM\*, <sup>6</sup>Azim K\*

5

6 *<sup>1</sup>Institute of Biomedical and Biomolecular Sciences, School of Pharmacy and Biomedical*  
7 *Science, University of Portsmouth, St Michael's Building, White Swan Road, Portsmouth,*  
8 *PO1 2DT, UK.*

9 *<sup>2</sup>Section of Human Anatomy, Department of Neuroscience, University of Padua, Padua, Italy*

10 *<sup>3</sup>Wolfson Centre for Age-Related Diseases, King's College London, Guy's Campus, London,*  
11 *United Kingdom*

12 *<sup>4</sup>Stem Cell and Brain Research Institute, Lyon, France*

13 *<sup>5</sup>Research Group Adult Neurogenesis & Cellular Reprogramming Institute of Physiological*  
14 *Chemistry; University Medical Center, Johannes Gutenberg University Mainz; Hanns-Dieter-*  
15 *Hüsch-Weg 19, 55128, Mainz*

16 *<sup>6</sup>Department of Neurology, Neuroregeneration, Medical Faculty, Heinrich-Heine-University,*  
17 *Düsseldorf, Germany.*

18

19 <sup>†</sup>Contributed equally to the paper

20

21 \*Corresponding authors: Professor Arthur M. Butt, School of Pharmacy and Biomedical  
22 Sciences, University of Portsmouth, St Michael's Building, White Swan Road, Portsmouth  
23 PO1 2DT, UK. Email: [arthur.Butt@port.ac.uk](mailto:arthur.Butt@port.ac.uk); Dr Kasum Azim, Department of Neurology,  
24 Neuroregeneration, Medical Faculty, Heinrich-Heine-University, Düsseldorf, Germany.  
25 Email: [Kasum.Azim@med.uni-duesseldorf.de](mailto:Kasum.Azim@med.uni-duesseldorf.de)

26

27 One-sentence summary: Drug discovery and CNS myelination

28

29 Key words: oligodendrogenesis; oligodendrocyte; pharmacogenomics, The Library of Integrated Network-Based  
30 Cellular Signatures/LINCS; subventricular zone; optic nerve; PI3K/Akt;

31

32 **Abstract**

33 Oligodendrocytes are the myelin forming cells of the central nervous system (CNS) and are  
34 generated from oligodendrocyte progenitor cells (OPCs). Disruption or loss of  
35 oligodendrocytes and myelin has devastating effects on CNS function and integrity, which  
36 occurs in diverse neurological disorders, including Multiple Sclerosis (MS), Alzheimer's  
37 disease (AD) and neuropsychiatric disorders. Hence, there is a need to develop new  
38 therapies that promote oligodendrocyte regeneration and myelin repair. A promising  
39 approach is drug repurposing, but most agents have potentially contrasting biological actions  
40 depending on the cellular context and their dose-dependent effects on intracellular  
41 regulatory pathways. Here, we have used a combined drug connectivity systems biology and  
42 neurobiological approach to identify compounds that exert positive and negative effects on  
43 oligodendroglia, depending on concentration. Notably, LY294002, a potent inhibitor of  
44 PI3K/Akt signalling, was the most highly ranked small molecule for both pro- and anti-  
45 oligodendroglial effects. We validated these *in silico* findings in multiple *in vivo* and *ex vivo*  
46 neurobiological models and demonstrate that low and high doses of LY294002 have a  
47 profoundly bipartite effect on the generation of OPCs and their differentiation into myelinating  
48 oligodendrocytes. Finally, we employed transcriptional profiling and signalling pathway  
49 activity assays to determine cell-specific mechanisms of action of LY294002 on  
50 oligodendrocytes and resolve optimal *in vivo* conditions required to promote myelin repair.  
51 These results demonstrate the power of multifactorial neurobiological and *in silico* strategies  
52 in determining the therapeutic potential of small molecules in neurodegenerative disorders.

53

## 54 **Introduction**

55 In the CNS, myelin is produced by oligodendrocytes that are generated from oligodendrocyte  
56 progenitor cells (OPCs) throughout life (1). During postnatal development, in addition to  
57 generating neural progenitors (NP), neural stem cells (NSCs) of the subventricular zone  
58 (SVZ) also pass through a number of distinct differentiation stages to generate OPCs, which  
59 migrate throughout the forebrain and differentiate into myelinating oligodendrocytes, in  
60 response to intrinsic and extracellular cues (2, 3). In the adult brain, a significant population  
61 of endogenous OPCs persist throughout the brain and have the function of life-long  
62 generation of oligodendrocytes, which is essential for myelination of new connections in  
63 learning and myelin repair in pathology (4, 5). In addition, the adult SVZ remains an  
64 important source of new OPCs to replenish endogenous populations, in particular following  
65 pathological demyelination (3, 6). However, long-term repair ultimately fails due to a decline  
66 in oligodendrocyte regeneration from both the SVZ (3, 7) and endogenous OPCs (8, 9),  
67 which severely impairs repair in numerous neuropathologies, including Multiple Sclerosis  
68 (MS) and Alzheimer's disease (AD) (9, 10). Hence, there is a need for new therapies that  
69 promote OPC regeneration and repair.

70

71 Connectivity mapping has been used in multiple clinical areas to connect biology and drug  
72 discovery by exploiting transcriptional similarities across treatment conditions and cell states  
73 (11). This strategy is a promising and direct approach to regulate neural cells and identify  
74 small molecules and transcriptional networks that have the potential to promote regeneration  
75 and repair in the CNS (3, 12-14). However, agents identified by these new therapeutic  
76 approaches have potentially divergent biological actions depending on their dose- and time-  
77 dependent effects on intracellular regulatory pathways. Thus, determining the cell-specific  
78 effects and precise mechanisms of action of small molecules on neural cells is essential for  
79 developing therapeutic strategies to promote CNS repair. In the present study, we have  
80 identified small molecules with the potential to regulate oligodendrocyte regeneration by  
81 utilizing a new comprehensive reference catalogue, LINCS (Library of Integrated Network-  
82 based Cellular Signatures), which hosts the gene expression phenotypes triggered by small  
83 molecules assayed at different concentrations across diverse cellular systems  
84 (<https://clue.io>). We identified a wide range of small molecules that targeted multiple  
85 regulatory pathways with the potential to both positively and negatively regulate  
86 oligodendrocyte differentiation. Significantly, the highest ranking small molecule, LY294002,  
87 was predicted to have both pro- and anti-oligodendroglial actions. LY294002 is a potent  
88 inhibitor of the PI3K/Akt signalling pathway, which is considered essential for  
89 oligodendrocyte differentiation and myelination (15, 16). We validated the pharmacogenomic  
90 findings in multiple *in vivo* and *ex vivo* neurobiological models and demonstrate for the first

91 time that LY294002 has a striking dose-dependent effect on oligodendrocytes, being  
92 severely destructive at high doses, but greatly stimulating oligodendrocyte generation and  
93 myelination at low doses. Furthermore, using whole genome transcriptomics and  
94 biochemical assays, we determined the cell-specific differential mechanisms of action of low  
95 and high LY294002 in oligodendrocytes. This study identifies striking contrasting effects of  
96 small molecules on neural cells depending on their dose-dependent actions on intracellular  
97 regulatory pathways, which is critical for the development of novel therapeutic strategies  
98 using small molecules to promote CNS repair.  
99

## 100 **Results**

### 101 **Pharmacogenomic screening for small molecules predicted to regulate myelination**

102 First, using datasets generated by the authors to profile postnatal and adult NSC and OL  
103 lineage cells (3, 13, 17-20), we curated essential landmark genes that can be defined as pro-  
104 or anti-oligodendrocyte differentiation (Fig. 1A). Next, we interrogated these genes in LINCS  
105 (<https://clue.io>) (11), to identify small molecules that shift the transcriptome of iPSC-derived  
106 NSCs (iNSCs) to that of myelinating oligodendrocytes (Fig. 1B). Then, we analysed the  
107 small molecule target-genes (TGs) whose expression is significantly modulated in iNSC to  
108 either positively or negatively regulate oligodendrocyte differentiation (Fig. 1C, D). Many of  
109 these TG networks have recognised functions in oligodendrocytes, such as the pro-  
110 oligodendroglial effects of inhibiting GSK3 $\beta$  (21) and anti-oligodendroglial effects of inhibiting  
111 mTOR (22). In contrast, the pro-oligodendroglial effect of HDAC inhibition appears counter-  
112 intuitive at first, since HDAC activity is essential for oligodendrocyte lineage progression  
113 (23), but transient HDAC inhibition can be neuroprotective and promote OPC plasticity (24,  
114 25). Significantly, inhibition of a number of pathways is predicted to have both pro- and anti-  
115 oligodendrocyte functions, most notably PI3K/Akt/mTOR inhibition (Fig. 1D). Consistent with  
116 this, the highest ranking pro- and anti-oligodendroglial small molecule was LY294002, a  
117 potent inhibitor of PI3K/Akt signalling, with broad kinase activity depending on concentration  
118 and cellular context (26). LY294002 exerts opposing transcriptional effects on iNSCs at low  
119 concentrations (2  $\mu$ M, here termed L-LY29) and high concentrations (10  $\mu$ M, here termed H-  
120 LY29) (Fig. 1E). The second highest-ranking anti-oligodendroglial small molecule was the  
121 specific Akt inhibitor Triciribine (TCN, Fig. 1E), and comparison of the target gene (TG)  
122 pathways and biological processes altered by the non-specific PI3K/Akt inhibitor LY294002  
123 compared to the specific Akt inhibitor TCN provided insight into the potential mechanisms  
124 that determine the opposing effects of L- and H-LY29 on oligodendrocytes and myelination,  
125 with the “FAK-PI3K-mTOR pathway” being most prominent (Fig. S1). In support of this,  
126 meta-analysis of the LINCS-derived TGs closely associated H-LY29 with TCN (Fig. 1F),  
127 consistent with the potential anti-oligodendroglial actions of H-LY29 being due to inhibition of  
128 PI3K/Akt/mTOR signalling, which is critical for OPC differentiation and myelination (27). In  
129 contrast, the pro-oligodendroglial actions of L-LY29 are most closely linked to the effects  
130 exerted by GSK3 $\beta$  inhibitors and metformin (Fig. 1F), both of which have been shown to  
131 rejuvenate OPC regeneration and promote remyelination (3, 9, 21), together with  
132 corticosteroids and the flavonoid epicatechin. Interestingly, L-LY29 is also closely associated  
133 with perturbation of HDACs (Fig. 1F), which has broad spectrum epigenetic effects that  
134 regulate OPC plasticity (25). These analyses identify potential mechanisms that determine  
135 predicted opposing effects of H- and L-LY29 on oligodendrocytes and myelination

136

137 **Bipartite concentration-dependent effects of LY294002 on oligodendrocyte**  
138 **development *in vivo***

139 The pharmacogenomic analysis identified LY294002 as a potentially potent modulator of  
140 oligodendrogenesis and predicted differential effects of low and high concentrations. We  
141 tested this *in vivo* by direct injection of agents into the cerebrospinal fluid (CSF) of  
142 anaesthetised mice for three days, commencing at postnatal day (P8) and analysing brains at  
143 P11, as described previously (21). These ages correspond to the main period of  
144 oligodendrocyte differentiation and myelination in the corpus callosum and dorsal cortex,  
145 after which the numbers of OPCs decline sharply by half with a concomitant doubling in  
146 newly formed myelinating oligodendrocytes (MYOLs) (21, 28). First, we determined the *in*  
147 *vivo* concentration-dependent effects of LY294002 and TCN (Fig. S2); TCN was selected  
148 because it is a selective small molecule inhibitor of Akt, but does not inhibit PI3K, the direct  
149 upstream activator of Akt (29, 30), whereas LY294002 is a potent inhibitor of PI3K, the  
150 upstream activator of Akt, but also has broad kinase activity (26). As predicted from the  
151 LINCS analysis, low doses of LY294002 ( $\leq 2 \mu\text{M}$ ) and high doses of LY294002 ( $\geq 10 \mu\text{M}$ )  
152 had contrasting pro- and anti-oligodendroglial effects in the corpus callosum, whereas TCN  
153 was anti-oligodendroglial at all concentrations tested (Fig. S2). Based on these dose-  
154 response experiments, we performed a detailed *in vivo* analysis of the effects of 2  $\mu\text{M}$   
155 LY294002 (L-LY29) and 20  $\mu\text{M}$  LY294002 (H-LY29), compared with 1.3  $\mu\text{M}$  TCN on OPC,  
156 MYOL and myelination (Fig. 2). Immunolabelling for PDGFR $\alpha$  and the cell proliferation  
157 marker PCNA demonstrate that L-LY29 increased the number of OPCs in cell cycle and  
158 doubled their number overall, in both the corpus callosum and dorsal cortex (Fig. 2A, B, E,  
159 F). In contrast, H-LY29 significantly reduced OPC numbers and proliferation (Fig. 2C, E, F),  
160 whereas TCN did not decrease OPC numbers (Fig. 2D, E, F), suggesting the negative  
161 effects of H-LY29 on OPCs are not mediated by PI3K/Akt signalling, but involve other  
162 mechanisms, such as ERK1/2, which is almost completely ablated by H-LY29 (Fig. S2G).  
163 Equivalent pro-oligodendroglial effects of L-LY29 were observed in MYOLs, with a greater  
164 than doubling of the number of PLP+ MYOL in the corpus callosum, compared to controls  
165 (Fig. 2G, H; Fig. S2A). Increased numbers of MYOLs were mirrored by a striking increase in  
166 the extent of MBP immunolabelling (Fig. 2Gii, Hii), quantified by the MBP+ myelin index, a  
167 measure of myelination (Fig. 2K), and increased corpus callosum thickness (Fig. 2L). In  
168 contrast, both H-LY29 and TCN halved the numbers of DsRed+ MYOLs (Fig. 2I, J; Fig.  
169 S2A), and axonal myelination and corpus callosum thickness were markedly decreased (Fig.  
170 2K, L); these quantitative data correspond to 400% more MYOL and MBP immunolabelling  
171 in L-LY29 compared to H-LY29 or TCN. In addition, MYOLs appeared normal in L-LY29  
172 compared to controls, but with increased numbers of cells and myelin sheaths (Fig. 2Gii,  
173 Hii), whereas MYOLs were atrophied in H-LY29 and TCN and exhibited abnormal appearing

174 oval somata (Fig. 2Iii, Jii). Due to their lower density, individual MYOLs are more clearly  
175 distinguished in the cortex, where they are evidently atrophied and support far fewer myelin  
176 sheaths in H-LY29 compared to L-LY29 and controls (Fig. 2M, N, O). Immunolabelling for  
177 APC and MBP, which are expressed sequentially in differentiating oligodendrocytes, showed  
178 L-LY29 significantly increased the density of both APC+/MBP- 'immature' oligodendrocytes  
179 (imOL) and APC+/MBP+ MYOL (Fig. 2P, Q), whereas the main effect of H-LY29 and TCN  
180 was to impair the differentiation of APC+/MBP+ MYOL (Fig. 2Q), consistent with evidence  
181 that Akt is required at the onset of oligodendrocyte terminal differentiation (31). The results  
182 fully validate the pharmacogenomic analysis and demonstrate that LY294002 exerts a  
183 profound bipartite concentration-dependent effect on oligodendrocyte lineage cells, with high  
184 LY294002 having an anti-oligodendroglial action comparable to inhibition of PI3K/Akt  
185 signalling by TCN, whereas low LY294002 massively increased the generation of OPCs and  
186 promoted differentiation of myelinating oligodendrocytes by unresolved mechanisms.

187

### 188 **LY294002 and TCN regulate oligodendrocyte generation from NSC of the dorsal SVZ**

189 The results above demonstrate that LY294002 regulates the development of forebrain  
190 MYOL, which are generated from OPCs that migrate from the dorsal SVZ and are derived  
191 from spatially defined pools of NSCs (2, 32). We therefore examined the effects of  
192 LY294002 on NSC and oligodendrogenesis in the dorsal SVZ, as characterised previously  
193 (32, 33). NSCs were identified as GFAP+ cells with a radial morphology adjacent to the  
194 ventricular surface, either as proliferating NSC (GFAP+/EdU+) or non-proliferating NSC  
195 (GFAP+/EdU-) (Fig. 3A, D). Newly generated pre-OPCs/TAPs (transiently amplifying  
196 progenitors) were identified by their co-expression of Ascl1 and Olig2 (Olig2+/Ascl1+), whilst  
197 OPCs were identified as Olig2+/Ascl1- (Fig. 3B, C, E). Quantification demonstrates that  
198 GFAP+/EdU+ and GFAP+/EdU- NSCs were significantly decreased by all three treatments  
199 (Fig. 3D), but in addition H-LY29 and TCN treatment severely disrupted NSC morphology  
200 (Fig. 3A) and almost completely abolished their proliferation (Fig. 3A, D). In contrast, newly  
201 formed oligodendroglial lineage cells exhibited differential responses to treatments  
202 compared to controls (Fig. 3Bi, Ci, E), whereby TAPs (Olig2+/Ascl1+) and OPCs  
203 (Olig2+/Ascl1-) were markedly increased by L-LY29 (Fig. 3Bii, Cii, E), whereas both  
204 populations were significantly reduced by H-LY29 (Fig. 3Biii, Ciii, E), whilst TCN significantly  
205 decreased TAPs (Fig. 3Biv, E), but had no significant effect on OPC generation (Fig. 3Civ,  
206 E). In addition, quantification of definitive OPC pools in the dorsal SVZ, using  
207 immunostaining for PDGFR $\alpha$  and PCNA (as illustrated in Fig. 2A-F), demonstrates their  
208 population is more than doubled by L-LY29, whereas they are significantly reduced in H-  
209 LY29 and not significantly altered by TCN (Fig. 3F). Overall, these data indicate that low  
210 LY294002 drives the generation of oligodendroglial cells from NSCs of the dorsal SVZ and



211 promotes the expansion of newly formed OPC, whereas high doses of LY294002 and TCN  
212 almost completely ablate oligodendrogenesis.

213

### 214 **LY294002 regulates oligodendrocyte generation in developing white matter**

215 Our results demonstrate that LY294002 regulates the generation of oligodendrocytes from  
216 the dorsal SVZ. Importantly, endogenous OPCs are a further major source of myelinating  
217 oligodendrocytes in the developing and adult brain and are potential targets of small  
218 molecules (21). To distinguish between the effects of LY294002 on NSCs and endogenous  
219 OPCs, we therefore examined the effects of LY294002 *ex vivo* in the optic nerve, a typical  
220 white matter tract that contains endogenous OPCs, but not NSCs (13, 21), together with the  
221 cerebellar slices, using P10-12 SOX10-EGFP reporter mice to identify all oligodendroglial  
222 cells (OPC/MYOL), as described previously (13, 34). In the optic nerve, LY294002 displayed  
223 strict dose-dependent effects, with L-LY29 increasing Sox10+ cells and H-LY29 almost  
224 completely ablating oligodendrocytes (Fig. S3A); the pro-oligodendroglial effects of L-LY29  
225 were confirmed in the cerebellar slice, which also enabled qPCR analysis of oligodendroglial  
226 transcripts, confirming marked increases in *Sox10* and *Mbp* (Fig. S3B). In the optic nerve  
227 and cerebellar slice, OPCs are the sole source of newly generated oligodendrocytes and  
228 these results verify that L- and H-LY-29 have a striking bipartite effect on endogenous  
229 OPCs, as observed in the forebrain and predicted by pharmacogenomics.

230

### 231 **Transcriptomic profiling of LY294002-responsive signalling pathways that regulate** 232 **oligodendroglial lineage progression**

233 The adult optic nerve is an excellent model for systems biological analysis of the  
234 mechanisms of action of small molecules on glial cells, since it does not contain neuronal  
235 nuclei and mRNA transcripts isolated from optic nerves are glial, with insignificant levels  
236 from other cells, such as endothelium (13, 34). We therefore used a combined  
237 neurobiological and transcriptomic analysis of adult mouse optic nerve to determine the  
238 effects of LY294002 on oligodendrocyte lineage cells (Fig. 4, SFig. 4). First, we verified that  
239 L- and H-LY29 have a bipartite effect on oligodendrocytes in adult white matter, with L-LY29  
240 significantly increasing both Sox10+ OPC/MYOL and PLP+ MYOL, whilst H-LY29  
241 significantly decreased Sox10+ OPC/MYOL, but not PLP+ MYOL (Fig. S4A-D). Notably, H-  
242 LY29 markedly inhibited Akt phosphorylation (Fig. S4E), and its negative effect on Sox10+  
243 cells are consistent with PI3K/Akt signalling being essential in OPCs (31, 35, 36), whereas  
244 the lack of effect of H-LY29 on PLP+ MYOL suggests PI3K/Akt signalling is less important in  
245 adult oligodendrocytes. In contrast, the pro-oligodendroglial effects of L-LY29 are at odds  
246 with it acting via PI3K/Akt signalling. To resolve this, we performed a differential  
247 transcriptomic analysis of optic nerves treated with L-LY29, compared to controls or H-LY29



248 (Fig. S4F-H). Consistent with the striking bipartite effects of L- and H-LY29, only a relatively  
249 small number (85) of genes were common to both treatment groups (Fig. S4H; Tables S1),  
250 and STRING and GO analysis highlighted networks and BPs associated with development  
251 as being common to L- and H-LY29, with *Igf1* representing a common core hallmark (Fig.  
252 S4J). In comparison, differential analysis identified the genes that were regulated by L-LY29  
253 (Fig. S4H), and using the webtool Enrichr the key L-LY29-responsive gene pathways were  
254 identified as 'Focal Adhesion', 'Wnt Signaling' and 'FAK-PI3K-mTOR signalling', while BPs  
255 induced by L-LY29 included 'Regulation of cell migration', 'Retrograde vesicle-mediated  
256 transport' 'protein phosphorylation and 'Mitotic cell cycle phase transition' (Fig. 4A). To  
257 elucidate the oligodendrocyte-specific L-LY29-responsive transcriptional networks, we  
258 interrogated our curated expression profiles of OPC- and MYOL-enriched genes (Fig. S4H;  
259 see Materials and Methods for details), which are visualised in a NESTED network for  
260 exploring the BPs leading to pro-oligodendroglial effects of L-LY29 (Fig. 4B, C). The most  
261 significant L-LY29-responsive OPC pathways are associated with cell cycle and  
262 differentiation, together with metabolism, nervous system development ( $p < 6.42e-46$ ),  
263 Neurogenesis ( $p < 1.07e-37$ ) and Cell morphogenesis ( $p < 1.97e-31$ ). Critical L-LY29-  
264 responsive signalling mediators in OPCs are *Egfr* and *Fzd1/2*, with associated key  
265 transcriptional regulators *Stat3* and *Tcf4*, indicating key roles of EGFR and Wnt signalling in  
266 mediating the pronounced effects of L-LY29 on OPCs, consistent with published evidence  
267 (21, 32, 33, 37, 38). GO analysis of L-LY29-responsive MYOL genes identified the most  
268 prominent biological processes as "Cell Differentiation" (Fig. 4C; Red,  $p < 3.68e-08$ ; PPI <  
269 1.54e-12) and "Cellular Protein Metabolic Process" (Fig. 4C; Blue,  $p < 2.55e-05$ ), with central  
270 roles for *Rhoa* and *Anln* (Anillin), which have established roles in regulating the expression  
271 of major myelin proteins (39, 40). Network analysis demonstrates that *Rhoa* is at the core of  
272 a number of key signalling networks (Fig. 4C; Red,  $p < 3.68e-08$ ; PPI < 1.54e-12), including  
273 known pro-oligodendroglial mediators *Fgfr1* (28) and *ErbB3* (27). The latter regulates  
274 oligodendrocytes via RAF-MAPK and PI3K/Akt, both of which were identified by  
275 pharmacogenomics as key potential targets for controlling oligodendrogenesis (Fig. S1) and  
276 are shown to be directly regulated by LY294002 (Fig. S2). These analyses identify stage-  
277 specific signalling pathways by which L-LY29 mediates the observed profound  
278 neurobiological effects on oligodendrocytes, with key roles for EGFR and Wnt signalling in  
279 massively expanding OPCs and FGFR1 and ERBB signalling in promoting myelination.

280

### 281 **Validation of systems biology characterization of cell-specific L-LY29-responsive** 282 **signalling mechanisms**

283 Finally, we performed a validation of the cellular effects predicted by LINCS (SFig. 1)  
284 compared to the cellular effects resolved experimentally (Fig. 4, Fig. S4), by interrogating L-

285 LY29-responsive oligodendroglial genes against the LINCS-derived TG pathways and BPs  
286 (Fig. 5A). Significantly, LINCS genes enriched in both L-LY29-responsive OPC and MYOL  
287 genes were associated with the pathway ‘Focal Adhesion-PI3K-Akt-mTOR-signaling’, which  
288 is a key target for pro-oligodendroglial small molecules (Fig. S1). Next, we constructed cell-  
289 specific L-LY29-responsive signalling networks in OPCs and MYOLs, using Cytoscape  
290 ClueGO (Fig. 5B, C; see Materials and Methods for details). Importantly, the results confirm  
291 that pathway terms “Focal Adhesion-PI3K-Akt-mTOR-signaling” and “Focal Adhesion” were  
292 both downregulated by L-LY29 in OPCs and MYOLs (Fig. 5B, C). Focal adhesion signal  
293 transduction is complex and exerts opposing roles on oligodendrocyte maturation (41),  
294 whereas signalling networks emanating from PI3K/Akt and affecting signalling by PTEN,  
295 GSK3 $\beta$  and mTOR were particularly evident in the effects of L-LY29 on OPCs and are  
296 known to be inhibitory in OPCs (21, 42). To test the predicted impact of L-LY29 on  
297 PI3K/Akt/mTOR signalling, we performed multiplex immunoassays of cerebellar slices  
298 treated with L-LY29, which significantly reduced phosphorylation of Akt, mTOR, Pten,  
299 p70S6, and Bad (Fig. 5D;  $p < 0.05$ ). Thus, these analyses identify stage-specific signalling  
300 pathways by which L-LY29 mediates the observed profound neurobiological effects on  
301 oligodendrocytes and comprehensively validate the LINCS generated catalogue of small  
302 molecules that have the potential to promote oligodendrocyte regeneration and myelination.  
303  
304

## 305 Discussion

306 Connectivity mapping holds considerable potential in the search for new therapies that  
307 promote repair in multiple neuropathologies (3, 13). However, it is important to determine the  
308 potentially contrasting biological actions of drugs depending on the cellular context and their  
309 potential dose-dependent effects on intracellular regulatory pathways. Here, using next  
310 generation drug connectivity mapping LINC<sup>s</sup> (<https://clue.io>) (11), we have identified small  
311 molecules that have marked dose-dependent effects on oligodendrocytes in the CNS.  
312 Surprisingly, LINC<sup>s</sup> analysis identified the small molecule kinase inhibitor LY294002 as the  
313 highest ranking agent predicted to have both pro- and anti-oligodendroglial effects, depending  
314 on dose, which we fully validated in multiple neurobiological *in vivo* and *ex vivo* models.  
315 Moreover, analysis of LY294002-responsive genes identified the cell-specific mechanisms of  
316 action of low and high doses of LY294002 on oligodendrocyte lineage cells. The results  
317 demonstrate that a combined drug connectivity mapping and neurobiological strategy is a  
318 promising and direct approach to identify small molecules and transcriptional networks that  
319 have the potential to promote regeneration and repair in the CNS.

320

321 A notable advantage of drug connectivity mapping is the opportunity it provides to identify  
322 target gene networks of small molecules and streamline the design of pre-clinical  
323 experiments. In the present study, after mapping transcriptional drug responses in iPSC-  
324 NSCs onto an oligodendroglial differentiation axis, our meta-analysis of LINC<sup>s</sup> data revealed  
325 that the PI3K/Akt inhibitor LY294002 was predicted to have dose-dependent pro- or anti-  
326 oligodendroglial actions. High LY294002 was predicted to cause oligodendrocyte demise via  
327 signalling networks and BPs also regulated by the specific Akt inhibitor TCN, e.g. Notch  
328 signalling (Fig. S1). As predicted by our connectivity mapping, both H-LY29 and TCN were  
329 confirmed to negatively affected oligodendrocyte lineage progression *in vivo* and *ex vivo*, in  
330 support of their effects on PI3k/Akt/mTOR signalling (16, 43, 44). In contrast, L-LY29  
331 upregulated essential drivers of oligodendrogenesis and differentiation, including Wnt  
332 signalling (32, 33). These findings were verified *in vivo* in the SVZ and H-LY29 and TCN  
333 were shown to perturb common signalling networks in the SVZ that control specification of  
334 OPC from NSC, consisting with Akt signalling in dorsal NSC/TAPs directing survival,  
335 proliferation, and self-renewal (45).

336

337 The dorsal SVZ niche during postnatal development expresses over 50 distinct signalling  
338 ligands, which are derived from multiple cellular sources within and in the vicinity of the  
339 dorsal SVZ, and affect the activity of multiple intracellular pathways, influencing cell fate  
340 choices such as survival, self-renewal and commitment to differentiate (3). Interestingly, our

341 *in vivo* data reveals complex effects of L-LY29 on multiple stages of oligodendroglial lineage  
342 commitment and progression. The observed depletion of proliferating NSCs, accompanied  
343 by a dramatic increase in their immediate oligodendrocyte-committed progeny (TAPs), point  
344 to a rapid effect of L-LY29 to promote commitment and progression along the  
345 oligodendrocyte lineage, consistent with upregulation of cell cycle activity and Wnt signaling  
346 (32, 33), as predicted by the LINC TG analysis (Fig. S1A). Importantly, our *ex vivo* data  
347 from optic nerve and cerebellar white matter tracts devoid of NSCs and TAPs supported our  
348 *in vivo* analyses and demonstrate that L-LY29 promotes OL generation from both the SVZ  
349 and endogenous OPCs by triggering a cascade of pro-oligodendrogenic signalling networks,  
350 consistent with its broad kinase activity and the pleiotropy of downstream effects of  
351 PI3K/Akt/mTOR signalling. LY294002 reversibly inhibits PI3K, but depending on dose can  
352 also bind to numerous other proteins (26), including the bromodomain proteins BRD2-4 are  
353 expressed along the entire oligodendroglial lineage and has the potential to promote  
354 oligodendroglial differentiation (46, 47). Intriguingly, alterations in GO terms “cell adhesion”,  
355 “PTEN signalling”, “Wnt signalling” and “cytoskeletal arrangements” are amongst the most  
356 significant transcriptional changes upon partial Brd protein blockade in NSCs (48). These  
357 data are matched by the major terms predicted and confirmed by our validity  
358 transcriptomic experiments following exposure of optic nerve to L-LY29, lending support to  
359 the possibility that targeting Brd proteins could represent a strategy for promoting myelin  
360 repair (49).

361

362 In summary, the extensive datasets hosted by the LINC consortium, comprising gene  
363 expression profiles generated using a diverse set of target cells under a broad set of  
364 conditions, provide unparalleled access to the multidimensional interactions emerging when  
365 assessing drug-gene interactions at whole-genome levels. Using LINC, we identified a  
366 range of small solutes that have the potential to regulate oligodendrocytes by targeting  
367 diverse intracellular signalling pathways. We comprehensively validated our drug networking  
368 strategy in multiple *in vivo* and *ex vivo* models, using diverse techniques to analyse the  
369 dose-dependent effects of LY294002, including lineage progression characterization,  
370 transcriptomics and signalling pathway assays. Our results demonstrated a key role for  
371 PI3K/Akt/mTOR signalling in regulating oligodendrocyte generation, as predicted by our  
372 analysis of the LINCS dataset, and in support of genetic studies using OPC-specific  
373 conditional knockout of mTOR, PTEN and GSK3 $\beta$  (42). However, conventional genetic  
374 approaches to target specific aspects of intracellular regulatory pathways often yield  
375 contradictory findings and cannot resolve dose-dependent effects, which is essential for the  
376 development of new therapies (22, 44, 50). In contrast, our demonstration of drastically

377 bipartite dose-dependent effects of the PI3K inhibitor LY294002 highlights the power of our  
378 pharmacological targeting approach to resolve complex cell-specific signalling networks that  
379 is not possible by conventional genetic techniques. These techniques offer unprecedented  
380 opportunities to gain insights into hard-to-predict context-specific mechanisms of action of  
381 small molecules to promote regeneration and repair in multiple neuropathologies.

## 382 **Materials and Methods**

### 383 **Curation of oligodendroglial hallmark genes from previous studies**

384 Our previous *in silico* screening for therapeutic agents capable of altering developmental  
385 myelination was performed by using the first generation of drug connectivity mapping (3, 51).  
386 The Library of Integrated Network-based Cellular Signatures ((LINCS) (11) (<https://clue.io>),  
387 consists of larger and cell-specific resource, comprising 1.3 million expression profiles  
388 obtained from over 90 cell lines/IPSC-derived cells, of which the IPSC-NSC drug-induced  
389 expression profiles were interrogated. Oligodendrogenesis-associated signatures were  
390 compiled using previously generated bulk and single-cell transcriptomic postnatal and adult  
391 OL lineage datasets (17, 18, 52), together with previously curated 'pro-oligodendrogenesis'  
392 signatures (3). Genes deemed significantly differentially expressed during OL differentiation  
393 in these datasets (<5% FDR; >1.8 FC) were standardized into Boolean values while genes  
394 commonly expressed within these datasets were removed. The resulting list of 1170 genes  
395 comprised the essential landmark genes which define the later stages in the OL lineage as  
396 positive values, whereas those in the negative ranges are expressed in dorsal NSCs/TAPs  
397 and in the earliest stages of OLs (3, 13, 17-20).

398

### 399 **Interrogating the LINC database for small molecule acquisition and defining their** 400 **mechanisms of action on OL lineage cells**

401 The LINC resource L1000FWD (<https://amp.pharm.mssm.edu/l1000fwd/#>) was used to  
402 process expression signatures to query the IPSC-NPC datasets. The R package g:profiler  
403 via RStudio was used to convert mouse gene symbols to human. The following link contains  
404 the final expression profiles and derived small molecules:  
405 <https://amp.pharm.mssm.edu/l1000fwd/result/5e638d9763095f00340d5b7e>. A number of  
406 small molecules (each tested in triplicate) within the database have been tested under more  
407 than one dose/duration condition, thus enabling the dissection of potential concentration-  
408 dependent and temporal effects. Duplicates within the top 25 for the pro-oligodendroglial or  
409 top 15 anti-correlating (i.e. predicted to inhibit differentiation) small molecules were pooled,  
410 averaged and ranked according to the combined p-values/Z-scores using the R package  
411 ggplot2. IPSC-NPC data were downloaded from the L1000FWD resource and tsne  
412 coordinates used to construct a geom dot plot via ggplot2, illustrating differences in the  
413 transcriptional impact of exposure to the selected small molecules. The R code provided in  
414 the resource ([https://amp.pharm.mssm.edu/l1000fwd/api\\_page](https://amp.pharm.mssm.edu/l1000fwd/api_page)) was adapted for extracting  
415 small molecule target-genes (TGs) in the positive and negative ranges (i.e. increased or  
416 decreased upon drug stimulation) among those relevant to the OL lineage/input expression  
417 profiles. The TGs for the lower concentration of LY294002 (3.3  $\mu\text{M}$  and 0.37  $\mu\text{M}$ ) and the  
418 higher concentrations (10  $\mu\text{M}$ , 3 datasets), were merged. TGs for Triciribine were derived



419 from the one available dataset. Next, the TGs were processed for pathway analysis using an  
420 R interface of the webtool Enrichr (53) (<https://cran.r-project.org/web/packages/enrichR/>)  
421 modified to derive pathways from the extracted small molecule TG lists and visualised using  
422 ggplots. The upregulated pathways were maintained in the positive ranges of the combined  
423 scoring of pvalues/z-score, whilst for downregulated pathways, values were converted to  
424 negative ranges. Pathway terms were shortened to fit within plots and their entire listings,  
425 together with raw transcriptomic datasets and output files used in this manuscript will be  
426 placed in github (<https://github.com/kasumaz>) upon acceptance. Files are made available  
427 during revision via a cloud drive: <https://uni-duesseldorf.sciebo.de/s/7OYQaSbmHTSThy9>

428

### 429 **In Vivo Procedures**

430 All animal handling and experimental procedures were conducted in agreement with  
431 institutional and regional/national guidelines and the Home Office Animals Scientific  
432 Procedures Act (1986) and following approval by the local relevant committees. Animals  
433 were housed under standard feeding and lighting conditions. Experiments were performed  
434 on the wildtype strain C57/BL6 and on transgenic mouse lines in which fluorescent reporters  
435 DsRed or enhanced green fluorescent protein (EGFP) are under control of the  
436 oligodendroglial-specific promoters: proteolipid protein 1 (PLP) or Sox10 as characterised  
437 previously (28). Unless stated, all materials were purchased from Sigma-Aldrich. In vivo  
438 experiments were performed on mice aged between postnatal day (P)8 and P11. All  
439 procedures were in accordance with the . Mice were either perfused or e killed humanely by  
440 cervical dislocation and brains removed rapidly and submerged into ice-cold fixative. Mice  
441 aged P8 were treated by intraventricular injections into the lateral ventricle daily for 3 days,  
442 and brains sampled at P11 following the final injection. Concentration of injected small  
443 molecules into the lateral ventricle were calculated and corrected based on previous  
444 spectrophotometry of a GSK3 $\beta$  inhibitor's bioavailability over time (21). Mice were deeply  
445 anaesthetised with isoflurane and differing concentrations of LY294002 (Sigma-Aldrich),  
446 dissolved in sterile DMSO, sterile-filtered and co-administered with sterile saline delivered  
447 into the cerebrospinal fluid (CSF) of the lateral ventricle using a Hamilton syringe, at a point  
448 2 mm from the midline along the Bregma, and to a depth of 2 mm. EdU  
449 (5-ethynyl-2'-deoxyuridine) was given as done previously at ages P9 and P10 (32) (32).

450

### 451 **Immunohistochemistry**

452 Brains were immersion fixed in 4% paraformaldehyde (PFA) in phosphate buffered saline  
453 (PBS), either for 3h at room temperature (RT), or overnight at 4°C. Following fixation, brains  
454 were washed in PBS and 50  $\mu$ m thick coronal sections were serially collected using a  
455 vibratome (28). Following washes in PBS, a blocking and permeabilization was performed by

456 incubation for 2h at RT or overnight at 4°C in 10% normal goat serum (NGS; Biosera) in  
457 0.3% triton-X-100 in phosphate buffered saline (PBST). Sections were then incubated for 3 h  
458 at RT with agitation, or overnight at 4°C, in primary antibodies diluted in NGS: rabbit anti-  
459 PDGFR $\alpha$  (1:400, gift from Prof Stallcup); goat anti-PDGFR $\alpha$  (1:200, R&D Systems; mouse  
460 anti-APC (CC1; 1:300, Millipore); rabbit anti-GFAP (1:300, DAKO); mouse anti-PCNA  
461 (1:400, Sigma-Aldrich) mouse anti-Ascl1 (1:200, BD Biosciences); rabbit anti-Olig2 (1:400,  
462 Millipore). After washes in PBST, sections were incubated for 2h at RT or overnight at 4°C in  
463 the dark with the appropriate secondary antibodies conjugated with Alexafluor 488, 568 or  
464 405 (1:500, Molecular Probes). Primary antibodies of different origin were diluted together in  
465 blocking buffer and co-dilutions of the appropriate secondary antibodies were used. Control  
466 experiments were performed using appropriate blocking peptides where available or  
467 otherwise by omission of the primary antibody. For PCNA, antigen retrieval was performed  
468 by pre-treating sections with PBST and NP-40 1% for 20 min to permeabilize the sections,  
469 and following brief washes in PBS, sections were immersed in pre-boiled citric acid and  
470 heated in a commercial microwave pressure cooker at full power for 30 sec for 2 cycles.  
471 After final washes in PBS, tissues were mounted on poly-lysine-coated glass slides with  
472 Vectashield mounting medium (Vector Laboratories) and sealed with coverslips. Images  
473 were acquired using an LSM 5 Pascal Axioskop2 or LSM 710 meta confocal microscope  
474 (Zeiss). Fluorescence was visualized at 488 nm (green), 568 nm (red) and 405 nm (blue)  
475 using argon, HeNe1 and diode lasers respectively, using an x40 oil immersion lens with high  
476 numerical aperture (1.3 nm). Optic nerves were immersion fixed in 4% paraformaldehyde  
477 (PFA) in phosphate-buffered saline (PBS) for 1 h at RT and following washes in PBS were  
478 whole-mounted on microscope slides in VectaShield (VectorLabs).

479

#### 480 **Optic nerve tissue and organotypic cerebellar slice cultures**

481 Organotypic cultures of mouse optic nerves were performed as described previously (13)  
482 and cerebellar slice cultures were prepared using tissue isolated from mice aged postnatal  
483 day P10-12 as previously described (54). Optic nerves were removed with the retina intact  
484 and cerebellar slices were placed immediately in ice-chilled oxygenated artificial (a)CSF  
485 composed of: NaCl 133 mM, KCl 3 mM, CaCl<sub>2</sub> 1.5 mM, NaH<sub>2</sub>PO<sub>4</sub> 1.2 mM, HEPES buffer  
486 10 mM pH 7.3, 0.5% penicillin and streptomycin (Invitrogen). For optic nerves, n = 6 optic  
487 nerves from 3 mice were used per experimental group for confocal microscopy analysis, and  
488 12 nerves from 6 mice were used for transcriptomic analysis, according to power  
489 calculations ensuring sample sizes were adequate to detect statistical differences. For prepa  
490 ring cerebellar slices, brain was rapidly removed and placed in oxygenated ice cold slicing  
491 solution containing (in mM) 25.95 NaHCO<sub>3</sub>, 1.39 NaH<sub>2</sub>PO<sub>4</sub>, 10 glucose, 124 NaCl, 2.95  
492 KCl, 10 MgCl<sub>2</sub>, 2 CaCl<sub>2</sub>, 1 MgSO<sub>4</sub>, 1000 units/mL penicillin/streptomycin) and 300  $\mu$ m

493 parasagittal slices were cut using a vibrating microtome 5100 mz (Campden Instruments  
494 LTD). Slices were then analysed under the dissecting microscope to ensure maintenance of  
495 normal cytoarchitecture. Isolated tissues were carefully cleaned of the arachnoid membrane  
496 and any attached peripheral/CNS tissue, then washed in aCSF and placed on semiporous  
497 culture membrane inserts (Millipore 0.4  $\mu\text{m}$ ). The medium (1 ml) for maintaining optic nerves  
498 consisted of 25% horse serum, 49% OptiMEM, 25% Hanks's balanced salt solution, 0.5%  
499 25 mM glucose, 0.5% penicillin and streptomycin and for cerebellar slices comprised 50%  
500 MEM (Eagle) with Glutamax-1, 25% EBSS, 25% horse serum, 130 mM glucose and 1%  
501 penicillin-streptomycin (all from GIBCO/Invitrogen). Tissue were maintained ex vivo at 37 °C  
502 in 95%O<sub>2</sub>/5% CO<sub>2</sub> for 3 days. LY29 was added directly to the culture medium using the  
503 concentrations and duration as stated in the main text and vehicle DMSO used as control.  
504 After 3 days for the optic nerve or 7 days for cerebellar slices, tissues were prepared for  
505 confocal imaging, RNA extraction or western blot.

506

### 507 **Cell counts, confocal microscopy and image analysis**

508 All experiments were conducted in triplicates and no samples were excluded; due to the  
509 study design animals were not blindly selected for group allocation, but all outcome  
510 measurements were subsequently conducted blindly, and all samples were included.  
511 Periventricular sections containing the lateral ventricle were analysed (>3 sections per brain)  
512 using homogenous quantification procedures (55); counts of OLs and OPC numbers in  
513 untreated controls confirmed that there were no significant differences between sections  
514 taken in this area (21). Images were captured using a Zeiss LSM Meta 5.1 or Zeiss LSM 7.1  
515 meta confocal microscope and processed with the latest Zeiss ZEN software (black edition),  
516 maintaining the acquisition parameters constant to allow comparison between samples.  
517 Coronal brain sections were used throughout and cell counts performed in the dorsal SVZ,  
518 corpus callosum and cerebral cortex on orthogonally projected confocal z-stacks, of 230  
519  $\mu\text{m}^2 \times 230 \mu\text{m}^2$  in the x-y-plane, and 30  $\mu\text{m}$  in the z-plane. 1 Hemisphere was used for  
520 quantification and the other hemisphere for capturing representative images. For  
521 extracellular markers, a nuclear counterstain (DAPI (Invitrogen) or Propidium Iodide (Sigma-  
522 Aldrich) was applied to aid quantification.

523

524 For analysis of optic nerve cultures, cells expressing either the Sox10-EGFP or PLP-DsRed  
525 reporter were visualised at 488nm or 546nm respectively using an argon laser. Images were  
526 captured on a Zeiss LSM 710 meta-confocal microscope using a x20 Plan-NEOFLUAR 20  
527 objective with a numerical aperture of 0.50. Images were captured maintaining the  
528 acquisition parameters constant between samples. Each nerve counted as a single sample  
529 and the total number of cells was counted midway along the length of the optic nerve in a

530 single field of view (FOV), comprising a constant volume of 200  $\mu\text{m}$   $\times$  200  $\mu\text{m}$  in the x–y-  
531 plane and 25  $\mu\text{m}$  in the z-plane, commencing 15  $\mu\text{m}$  below the pial surface. For all  
532 comparisons, the significance level was set to 5%; due to the explorative nature of this  
533 study, no adjustment was made to the significance level. Cell counts are expressed as mean  
534 number of cells per FOV  $\pm$  standard error of the mean (SEM). There were six nerves from  
535 three mice in each experimental group and statistical analysis was performed as follows.  
536 Measurement of a myelin index was performed on sections from PLP-DsRed mice (21),  
537 providing a reliable readout of myelinated sheaths through a z-plane. Confocal micrographs  
538 captured with an x40 objective from every 5h confocal section in a series of 30 (n=7 sections  
539 of 30  $\mu\text{m}$  thickness) were analysed. The myelin index score presented is the total number of  
540 DsRed+ myelin sheaths in a 30  $\mu\text{m}$  thickness from an individual nerve. GraphPad Prism v6  
541 for multiple variables, using either Dunnett’s Multiple Comparisons test, or one-way analysis  
542 of variance (ANOVA) followed by Bonferroni’s posthoc test, and for two variable using  
543 unpaired t-tests (referred to as t-test) was applied.

544

#### 545 **Western blot**

546 P9 pups were bilaterally intraventricularly injected with LY29 as described above. 45 mins  
547 following injection, pups were sacrificed by cervical dislocation and tissue rapidly  
548 microdissected and flash frozen in lysis buffer in liquid nitrogen for storage at  $-80^{\circ}\text{C}$ . Tissue  
549 from several pups was pooled to yield individual samples used for later molecular assays.  
550 Corpus callosum or optic nerve tissue were centrifuged at 4000  $\times$  g to obtain tissue pellets  
551 and proteins extracted with lysis buffer as described previously (21). After centrifugation for  
552 15 min at 10,000  $\times$  g and  $4^{\circ}\text{C}$ , supernatant was transferred to Ultrafree MC centrifugal spin  
553 columns (Millipore) for separation and concentration of protein extracts above 15 KDa and  
554 Bradford protein assay applied for determination of protein content. For protein analysis,  
555 samples were then solubilised and denatured in Lamelli sample buffer (Biorad) with  $\beta$ -  
556 mercaptoethanol (Sigma-Aldrich) for 5 min at  $95^{\circ}\text{C}$  and were placed on ice until loading. 15  
557  $\mu\text{g}$  were loaded onto the gel with Lamelli sample buffer. Solubilised, denatured proteins were  
558 then separated via SDS-PAGE and transferred to a PVDF membrane (GE Healthcare,  
559 Amersham). Blots were preincubated in a blocking solution of 5% BSA in 0.2% TBST (0.1 M  
560 Tris base, 0.1% Tween 20, pH 7.4) for 1 hr at RT, incubated with primary antibodies  
561 overnight at  $4^{\circ}\text{C}$  and after washing, with a horseradish peroxidase-conjugated anti-rabbit  
562 antibody (1:10,000–1:25,000; Pierce Biotechnology). Primary antibodies were all obtained  
563 from Cell Signaling and used in concentrations of 1:500 for phosphor-forms and 1:2000 for  
564 total forms of protein. Protein bands were detected by adding SuperSignal West Pico  
565 Chemiluminescent Substrate (Pierce) by exposing the blot in a Stella detector (Raytest).  
566 Densitometry analysis was performed with NIH software and by normalizing the band

567 intensities to total Akt or total Erk1/2 values and significance assessed using one-way  
568 analysis of variance (ANOVA) followed by Bonferroni's posthoc test.

569

### 570 **RNA extraction and qPCR**

571 RNA extraction from cerebellar slices was performed by placing them in 500  $\mu$ L of ice-chilled  
572 Trizol. 180  $\mu$ g of total RNA from each sample were converted to single stranded cDNA using  
573 the SuperScript® VILOTM cDNA Synthesis Kit (Invitrogen-Life Technologies) following  
574 manufacturer instructions. Subsequently, cDNA was added to a mixture of FastStart  
575 Essential DNA Probes Master and of FAM dye-labelled primers following manufacturer's  
576 instructions. Samples were run using a Roche Lyghtcycler 96 (Roche) instrument. Reaction  
577 consisted of pre-incubation at 95°C for 600 seconds followed by 45 cycles of two step  
578 amplification of 95 °C for 10 seconds and 60°C for 30 seconds. Data normalisation to the  
579 housekeeping gene Gapdh. Primer sequences: Mbp: 5'ATTCACCGAGGAGAGGCTGGAA'3  
580 / 3'TGTGTGCTTGGAGTCTGTCACC'5; Apc: 5'GTGGACTGTGAGATGTATGGGC'3 /  
581 3'CACAAGTGCTCTCATGCAGCCT'5; Sox10: 5'AGTACCCGCACCTGCACA'3; /  
582 3'GAAGGGGCGCTTGTCACT'5; Cspg4/NG2: 5'GAGGTCTTGGTGAACCTCACCC'3 /  
583 3'GACAGTAGGAGACCGATGGTGT'5; Gapdh: 5'TTGATGGCAACAATCTCCAC'3 /  
584 3'CGTCCCGTAGACAAAATGGT'5. Relative gene expression levels were determined using  
585 the 2  $\Delta\Delta$ -CT method (33). Primers were designed by Primer Express 1.5 software and  
586 synthesized by Eurofins MG. Gene expression data are presented as mean and the  
587 standard error of the mean (+SEM), and samples were compared for significance via t-test  
588 using GraphPad Prism v3.02 software.

589

### 590 **Whole genome transcriptome analysis**

591 Complete details are provided in a recent study from the authors as identical procedures  
592 were followed for preparation of RNA for Affymetrix GeneChip Mouse Genome 430 (13).  
593 Downstream quality control steps and data analysis of produced .CEL image and .CHP  
594 image files were performed using Affymetrix GeneChip Operating Software. Agilent  
595 GeneSpring GX 12 software was used to normalise the datasets using the MAS-5 algorithm  
596 and further statistical analyses. GeneSpring was used to generate hierarchical clustering  
597 and the meta-analysis profiles of oligodendroglia-specific (OPC and MYOL) signatures from  
598 published databases (17, 56). Gene Ontology analysis was performed using  
599 ConsensusPathDB, String V10.5 and STITCH db, described in detail previously (13). Data  
600 are available via the link provided (<https://uni-duesseldorf.sciebo.de/s/32r6pWUwjpVG5Z7>)  
601 until acceptance and raw data are made available in the Github repository.

602

603

604 **Bioplex immunoassay**

605 Cerebellar slices of 300  $\mu\text{m}$  thickness were isolated from P11 wild type mice C57BL/6 strain  
606 and incubated for 3d as previously described. After 3d, slices were washed in ice-cold cell  
607 wash buffer and lysed according to the manufacturer's instructions. Total protein content  
608 was determined via BCA assay and samples and cell lysate controls were diluted to 10  
609  $\mu\text{g}/\text{well}$  (50  $\mu\text{L}$ ) in lysis buffer to ensure a constant sample input across all samples. Briefly,  
610 samples blank (detection antibody) were loaded in duplicates in a 96-flat bottom well plate  
611 (Biorad) with previously diluted custom-made premixed fluorescent beads, which allowed the  
612 simultaneous quantification of phosphorylation levels in 7 analytes, and incubated for 15-18h  
613 at RT under constant shaking. After washings in wash buffer, samples were incubated in  
614 detection antibody for 30 minutes, washed again prior to incubation in Streptavidin-PE for  
615 10minutes. All incubations were performed at RT, under constant shaking and covered from  
616 light to protect the light-sensitive beads. Resuspended beads were then transferred to the  
617 Bio-plex Suspension Array system (BioRad) for quantification of phosphoproteins  
618 fluorescence intensity and results were expressed as mean fluorescence intensity (MFI).  
619 Further analysis was performed manually for excluding subtract blank MFI values  
620 (background) for each analyte from each sample. Statistical significance was calculated with  
621 GraphPad Prism 6.

622

623 **Supplementary Materials**

624 **Fig. S1:** Prediction of the cellular effects of LINCS-derived small molecules on  
625 oligodendrocyte lineage cells.

626

627 **Fig. S2:** Concentration-dependent effects of LY294002 (LY-29) and Triciribine on stage-  
628 specific oligodendroglia in the corpus callosum and cortex.

629



630 **Fig. S3:** LY294002 regulates oligodendroglial cells in the postnatal optic nerve and  
631 cerebellar slices ex vivo.

632

633 **Fig. S4:** Concentration-dependent effects of LY29 on adult optic nerve oligodendroglia and  
634 whole genome profiling for revealing genes regulated by LY29.

635

636 **Tables S1:** Concentration-dependency of LY294002 on transcriptome alterations in adult  
637 optic nerve. Related to Fig. S4L. Tables can be visualised at the cloud link: [https://uni-](https://uni-duesseldorf.sciebo.de/s/L27W5LaxL515JdT)  
638 [duesseldorf.sciebo.de/s/L27W5LaxL515JdT](https://uni-duesseldorf.sciebo.de/s/L27W5LaxL515JdT)

639

640 **Tables S2:** Meta-analysis of L-LY294002 on OPC and MYOL enriched expression  
641 signatures. Related to Fig. S4L. Tables can be visualised at the cloud link: [https://uni-](https://uni-duesseldorf.sciebo.de/s/oaCiiS0VVheergd)  
642 [duesseldorf.sciebo.de/s/oaCiiS0VVheergd](https://uni-duesseldorf.sciebo.de/s/oaCiiS0VVheergd)

643

644

645 **References:**

- 646 1. K. M. Young, K. Psachoulia, R. B. Tripathi, S.-J. Dunn, L. Cossell, D. Attwell, K. Tohyama, W. D.  
647 Richardson, Oligodendrocyte dynamics in the healthy adult CNS: evidence for myelin  
648 remodeling. *Neuron* **77**, 873-885 (2013)10.1016/j.neuron.2013.01.006).
- 649 2. K. Azim, B. Berninger, O. Raineteau, Mosaic Subventricular Origins of Forebrain  
650 Oligodendrogenesis. *Front Neurosci* **10**, 107 (2016)10.3389/fnins.2016.00107).
- 651 3. K. Azim, D. Angonin, G. Marcy, F. Pieropan, A. Rivera, V. Donega, C. Cantu, G. Williams, B.  
652 Berninger, A. M. Butt, O. Raineteau, Pharmacogenomic identification of small molecules for  
653 lineage specific manipulation of subventricular zone germinal activity. *PLoS Biol* **15**,  
654 e2000698 (2017); published online EpubMar (10.1371/journal.pbio.2000698).
- 655 4. E. G. Hughes, J. L. Orthmann-Murphy, A. J. Langseth, D. E. Bergles, Myelin remodeling  
656 through experience-dependent oligodendrogenesis in the adult somatosensory cortex. *Nat*  
657 *Neurosci* **21**, 696-706 (2018); published online EpubMay (10.1038/s41593-018-0121-5).
- 658 5. F. C. Ortiz, C. Habermacher, M. Graciarena, P.-Y. Houry, A. Nishiyama, B. Nait Oumesmar, M.  
659 C. Angulo, Neuronal activity in vivo enhances functional myelin repair. *JCI Insight* **4**, (2019);  
660 published online Epub05/02/ (10.1172/jci.insight.123434).
- 661 6. Y. L. Xing, P. T. Röth, J. A. S. Stratton, B. H. A. Chuang, J. Danne, S. L. Ellis, S. W. Ng, T. J.  
662 Kilpatrick, T. D. Merson, Adult neural precursor cells from the subventricular zone contribute  
663 significantly to oligodendrocyte regeneration and remyelination. *The Journal of neuroscience*  
664 *: the official journal of the Society for Neuroscience* **34**, 14128-14146  
665 (2014)10.1523/JNEUROSCI.3491-13.2014).
- 666 7. M. Segel, B. Neumann, M. F. E. Hill, I. P. Weber, C. Viscomi, C. Zhao, A. Young, C. C. Agle, A.  
667 J. Thompson, G. A. Gonzalez, A. Sharma, S. Holmqvist, D. H. Rowitch, K. Franze, R. J. M.  
668 Franklin, K. J. Chalut, Niche stiffness underlies the ageing of central nervous system  
669 progenitor cells. *Nature* **573**, 130-134 (2019); published online EpubSep (10.1038/s41586-  
670 019-1484-9).
- 671 8. F. J. Sim, C. Zhao, J. Penderis, R. J. Franklin, The age-related decrease in CNS remyelination  
672 efficiency is attributable to an impairment of both oligodendrocyte progenitor recruitment  
673 and differentiation. *The Journal of neuroscience : the official journal of the Society for*  
674 *Neuroscience* **22**, 2451-2459 (2002); published online EpubApr 1 (20026217).
- 675 9. B. Neumann, R. Baror, C. Zhao, M. Segel, S. Dietmann, K. S. Rawji, S. Foerster, C. R. McClain,  
676 K. Chalut, P. van Wijngaarden, R. J. M. Franklin, Metformin Restores CNS Remyelination  
677 Capacity by Rejuvenating Aged Stem Cells. *Cell stem cell* **25**, 473-485.e478 (2019); published  
678 online EpubOct 3 (10.1016/j.stem.2019.08.015).
- 679 10. I. Vanzulli, M. Papanikolaou, I. C. De-La-Rocha, F. Pieropan, A. D. Rivera, D. Gomez-Nicola, A.  
680 Verkhatsky, J. J. Rodriguez, A. M. Butt, Disruption of oligodendrocyte progenitor cells is an  
681 early sign of pathology in the triple transgenic mouse model of Alzheimer's disease.  
682 *Neurobiology of Aging* **94**, 130-139 (2020); published online Epub2020/10/01/  
683 (<https://doi.org/10.1016/j.neurobiolaging.2020.05.016>).
- 684 11. A. Subramanian, R. Narayan, S. M. Corsello, D. D. Peck, T. E. Natoli, X. Lu, J. Gould, J. F. Davis,  
685 A. A. Tubelli, J. K. Asiedu, D. L. Lahr, J. E. Hirschman, Z. Liu, M. Donahue, B. Julian, M. Khan,  
686 D. Wadden, I. C. Smith, D. Lam, A. Liberzon, C. Toder, M. Bagul, M. Orzechowski, O. M.  
687 Enache, F. Piccioni, S. A. Johnson, N. J. Lyons, A. H. Berger, A. F. Shamji, A. N. Brooks, A. Vrcic,  
688 C. Flynn, J. Rosains, D. Y. Takeda, R. Hu, D. Davison, J. Lamb, K. Ardlie, L. Hogstrom, P.  
689 Greenside, N. S. Gray, P. A. Clemons, S. Silver, X. Wu, W. N. Zhao, W. Read-Button, X. Wu, S.  
690 J. Haggarty, L. V. Ronco, J. S. Boehm, S. L. Schreiber, J. G. Doench, J. A. Bittker, D. E. Root, B.  
691 Wong, T. R. Golub, A Next Generation Connectivity Map: L1000 Platform and the First  
692 1,000,000 Profiles. *Cell* **171**, 1437-1452 e1417 (2017); published online EpubNov 30  
693 (10.1016/j.cell.2017.10.049).

- 694 12. E. J. R. Fletcher, A. D. Jamieson, G. Williams, P. Doherty, S. Duty, Targeted repositioning  
695 identifies drugs that increase fibroblast growth factor 20 production and protect against 6-  
696 hydroxydopamine-induced nigral cell loss in rats. *Scientific reports* **9**, 8336 (2019); published  
697 online EpubJun 6 (10.1038/s41598-019-44803-1  
698 10.1038/s41598-019-44803-1 [pii]).
- 699 13. A. D. Rivera, A. M. Butt, Astrocytes are direct cellular targets of lithium treatment: novel  
700 roles for lysyl oxidase and peroxisome-proliferator activated receptor-gamma as astroglial  
701 targets of lithium. *Translational psychiatry* **9**, 211 (2019); published online EpubSep 2  
702 (10.1038/s41398-019-0542-2).
- 703 14. A. Lipponen, J. Paananen, N. Puhakka, A. Pitkanen, Analysis of Post-Traumatic Brain Injury  
704 Gene Expression Signature Reveals Tubulins, Nfe2l2, Nfkb, Cd44, and S100a4 as Treatment  
705 Targets. *Scientific reports* **6**, 31570 (2016); published online EpubAug 17 (srep31570 [pii]  
706 10.1038/srep31570).
- 707 15. G. S. Vemuri, F. A. McMorris, Oligodendrocytes and their precursors require  
708 phosphatidylinositol 3-kinase signaling for survival. *Development* **122**, 2529-2537 (1996);  
709 published online EpubAug (
- 710 16. C. Norrmen, U. Suter, Akt/mTOR signalling in myelination. *Biochemical Society transactions*  
711 **41**, 944-950 (2013); published online EpubAug (10.1042/BST20130046).
- 712 17. K. Azim, R. Akkermann, M. Cantone, J. Vera, J. J. Jadasz, P. Kury, Transcriptional Profiling of  
713 Ligand Expression in Cell Specific Populations of the Adult Mouse Forebrain That Regulates  
714 Neurogenesis. *Frontiers in neuroscience* **12**, 220 (2018)10.3389/fnins.2018.00220).
- 715 18. K. Azim, A. Hurtado-Chong, B. Fischer, N. Kumar, S. Zweifel, V. Taylor, O. Raineteau,  
716 Transcriptional Hallmarks of Heterogeneous Neural Stem Cell Niches of the Subventricular  
717 Zone. *Stem Cells* **33**, 2232-2242 (2015); published online EpubJul (10.1002/stem.2017).
- 718 19. K. Azim, F. Calzolari, M. Cantone, R. Akkermann, J. Vera, H.-P. Hartung, O. Basak, A. M. Butt,  
719 P. Küry, Dissecting the Transcriptional Landscapes Orchestrating Oligodendrocyte  
720 Specification from the Adult Subventricular Zone by Single Cell Sequencing. (manuscript in  
721 revision).
- 722 20. M. Cantone, M. Kuspert, S. Reiprich, X. Lai, M. Eberhardt, P. Gottle, F. Beyer, K. Azim, P. Kury,  
723 M. Wegner, J. Vera, A gene regulatory architecture that controls region-independent  
724 dynamics of oligodendrocyte differentiation. *Glia*, (2019); published online EpubFeb 7  
725 (10.1002/glia.23569).
- 726 21. K. Azim, A. M. Butt, GSK3beta negatively regulates oligodendrocyte differentiation and  
727 myelination in vivo. *GLIA* **59**, 540-553 (2011); published online EpubApr  
728 (10.1002/glia.21122).
- 729 22. T. L. Wood, K. K. Bercury, S. E. Cifelli, L. E. Mursch, J. Min, J. Dai, W. B. Macklin, mTOR: a link  
730 from the extracellular milieu to transcriptional regulation of oligodendrocyte development.  
731 *ASN neuro* **5**, e00108 (2013); published online EpubMar 19 (10.1042/AN20120092).
- 732 23. M. Marin-Husstege, M. Muggironi, A. Liu, P. Casaccia-Bonnel, Histone deacetylase activity is  
733 necessary for oligodendrocyte lineage progression. *The Journal of neuroscience : the official*  
734 *journal of the Society for Neuroscience* **22**, 10333-10345 (2002)10.1523/JNEUROSCI.22-23-  
735 10333.2002).
- 736 24. A. Gregath, Q. R. Lu, Epigenetic modifications—insight into oligodendrocyte lineage  
737 progression, regeneration, and disease. *FEBS Letters* **592**, 1063-1078 (2018); published  
738 online Epub2018/04/01 (10.1002/1873-3468.12999).
- 739 25. C. A. Lyssiotis, J. Walker, C. Wu, T. Kondo, P. G. Schultz, X. Wu, Inhibition of histone  
740 deacetylase activity induces developmental plasticity in oligodendrocyte precursor cells.  
741 *Proceedings of the National Academy of Sciences* **104**, 14982  
742 (2007)10.1073/pnas.0707044104).

- 743 26. S. I. Gharbi, M. J. Zvelebil, S. J. Shuttleworth, T. Hancox, N. Saghir, J. F. Timms, M. D.  
744 Waterfield, Exploring the specificity of the PI3K family inhibitor LY294002. *Biochem J* **404**, 15-  
745 21 (2007); published online EpubMay 15 (10.1042/BJ20061489).
- 746 27. A. Ishii, M. Furusho, W. Macklin, R. Bansal, Independent and cooperative roles of the  
747 Mek/ERK1/2-MAPK and PI3K/Akt/mTOR pathways during developmental myelination and in  
748 adulthood. *Glia* **67**, 1277-1295 (2019)10.1002/glia.23602).
- 749 28. K. Azim, O. Raineteau, A. M. Butt, Intraventricular injection of FGF-2 promotes generation of  
750 oligodendrocyte-lineage cells in the postnatal and adult forebrain. *GLIA* **60**, 1977-1990  
751 (2012); published online EpubDec (10.1002/glia.22413).
- 752 29. N. Berndt, H. Yang, B. Trinczek, S. Betzi, Z. Zhang, B. Wu, N. J. Lawrence, M. Pellecchia, E.  
753 Schönbrunn, J. Q. Cheng, S. M. Sebti, The Akt activation inhibitor TCN-P inhibits Akt  
754 phosphorylation by binding to the PH domain of Akt and blocking its recruitment to the  
755 plasma membrane. *Cell Death Differ* **17**, 1795-1804 (2010)10.1038/cdd.2010.63).
- 756 30. L. Yang, H. C. Dan, M. Sun, Q. Liu, X.-m. Sun, R. I. Feldman, A. D. Hamilton, M. Polokoff, S. V.  
757 Nicosia, M. Herlyn, S. M. Sebti, J. Q. Cheng, Akt/Protein Kinase B Signaling Inhibitor-2, a  
758 Selective Small Molecule Inhibitor of Akt Signaling with Antitumor Activity in Cancer Cells  
759 Overexpressing Akt. *Cancer Research* **64**, 4394 (2004)10.1158/0008-5472.CAN-04-0343).
- 760 31. A. I. Flores, S. P. Narayanan, E. N. Morse, H. E. Shick, X. Yin, G. Kidd, R. L. Avila, D. A.  
761 Kirschner, W. B. Macklin, Constitutively active Akt induces enhanced myelination in the CNS.  
762 *J Neurosci* **28**, 7174-7183 (2008); published online EpubJul 9 (10.1523/JNEUROSCI.0150-  
763 08.2008).
- 764 32. K. Azim, B. Fischer, A. Hurtado-Chong, K. Draganova, C. Cantu, M. Zemke, L. Sommer, A. Butt,  
765 O. Raineteau, Persistent Wnt/beta-catenin signaling determines dorsalization of the  
766 postnatal subventricular zone and neural stem cell specification into oligodendrocytes and  
767 glutamatergic neurons. *Stem Cells* **32**, 1301-1312 (2014); published online EpubMay  
768 (10.1002/stem.1639).
- 769 33. K. Azim, A. Rivera, O. Raineteau, A. M. Butt, GSK3beta regulates oligodendrogenesis in the  
770 dorsal microdomain of the subventricular zone via Wnt-beta-catenin signaling. *GLIA* **62**, 778-  
771 779 (2014); published online EpubMay (10.1002/glia.22641).
- 772 34. M. G. Salter, R. Fern, NMDA receptors are expressed in developing oligodendrocyte  
773 processes and mediate injury. *Nature* **438**, 1167-1171 (2005); published online EpubDec 22  
774 (10.1038/nature04301).
- 775 35. W. A. Tyler, N. Gangoli, P. Gokina, H. A. Kim, M. Covey, S. W. Levison, T. L. Wood, Activation  
776 of the mammalian target of rapamycin (mTOR) is essential for oligodendrocyte  
777 differentiation. *J Neurosci* **29**, 6367-6378 (2009); published online EpubMay 13  
778 (10.1523/JNEUROSCI.0234-09.2009).
- 779 36. J. K. Ness, N. E. Mitchell, T. L. Wood, IGF-I and NT-3 signaling pathways in developing  
780 oligodendrocytes: differential regulation and activation of receptors and the downstream  
781 effector Akt. *Dev Neurosci* **24**, 437-445 (2002).
- 782 37. A. Y. Galvez-Contreras, A. Quiñones-Hinojosa, O. Gonzalez-Perez, The role of EGFR and ErbB  
783 family related proteins in the oligodendrocyte specification in germinal niches of the adult  
784 mammalian brain. *Front Cell Neurosci* **7**, 258-258 (2013)10.3389/fncel.2013.00258).
- 785 38. A. Aguirre, J. L. Dupree, J. M. Mangin, V. Gallo, A functional role for EGFR signaling in  
786 myelination and remyelination. *Nat Neurosci* **10**, 990-1002 (2007); published online EpubAug  
787 (10.1038/nn1938).
- 788 39. M. S. Erwig, J. Patzig, A. M. Steyer, P. Dibaj, M. Heilmann, I. Heilmann, R. B. Jung, K. Kusch,  
789 W. Mobius, O. Jahn, K. A. Nave, H. B. Werner, Anillin facilitates septin assembly to prevent  
790 pathological unfoldings of central nervous system myelin. *eLife* **8**, (2019); published online  
791 EpubJan 23 (10.7554/eLife.43888).

- 792 40. A. J. Piekny, M. Glotzer, Anillin is a scaffold protein that links RhoA, actin, and myosin during  
793 cytokinesis. *Current biology : CB* **18**, 30-36 (2008); published online EpubJan 8  
794 (10.1016/j.cub.2007.11.068).
- 795 41. A. D. Lafrenaye, B. Fuss, Focal adhesion kinase can play unique and opposing roles in  
796 regulating the morphology of differentiating oligodendrocytes. *J Neurochem* **115**, 269-282;  
797 published online EpubOct (JNC6926 [pii]  
798 10.1111/j.1471-4159.2010.06926.x).
- 799 42. E. Gonzalez-Fernandez, H. K. Jeong, M. Fukaya, H. Kim, R. R. Khawaja, I. N. Srivastava, A.  
800 Waisman, Y. J. Son, S. H. Kang, PTEN negatively regulates the cell lineage progression from  
801 NG2(+) glial progenitor to oligodendrocyte via mTOR-independent signaling. *eLife* **7**;  
802 published online EpubFeb 20 (10.7554/eLife.32021  
803 32021 [pii]).
- 804 43. J. M. Gaesser, S. L. Fyffe-Maricich, Intracellular signaling pathway regulation of myelination  
805 and remyelination in the CNS. *Exp Neurol* **283**, 501-511 (2016); published online EpubSep  
806 (10.1016/j.expneurol.2016.03.008).
- 807 44. G. Figlia, D. Gerber, U. Suter, Myelination and mTOR. *Glia* **66**, 693-707 (2018); published  
808 online EpubApr (10.1002/glia.23273).
- 809 45. A. D. Sinor, L. Lillien, Akt-1 expression level regulates CNS precursors. *J Neurosci* **24**, 8531-  
810 8541 (2004); published online EpubSep 29 (10.1523/JNEUROSCI.1470-04.2004).
- 811 46. M. Gacias, G. Gerona-Navarro, A. N. Plotnikov, G. Zhang, L. Zeng, J. Kaur, G. Moy, E.  
812 Rusinova, Y. Rodriguez, B. Matikainen, A. Vincek, J. Joshua, P. Casaccia, M. M. Zhou, Selective  
813 chemical modulation of gene transcription favors oligodendrocyte lineage progression.  
814 *Chemistry & biology* **21**, 841-854 (2014); published online EpubJul 17  
815 (10.1016/j.chembiol.2014.05.009).
- 816 47. A. Dittmann, T. Werner, C. W. Chung, M. M. Savitski, M. Falth Savitski, P. Grandi, C. Hopf, M.  
817 Lindon, G. Neubauer, R. K. Prinjha, M. Bantscheff, G. Drewes, The commonly used PI3-kinase  
818 probe LY294002 is an inhibitor of BET bromodomains. *ACS chemical biology* **9**, 495-502  
819 (2014); published online EpubFeb 21 (10.1021/cb400789e).
- 820 48. J. Li, J. Ma, G. Meng, H. Lin, S. Wu, J. Wang, J. Luo, X. Xu, D. Tough, M. Lindon, I. Rioja, J.  
821 Zhao, H. Mei, R. Prinjha, Z. Zhong, BET bromodomain inhibition promotes neurogenesis  
822 while inhibiting gliogenesis in neural progenitor cells. *Stem cell research* **17**, 212-221 (2016);  
823 published online EpubSep (10.1016/j.scr.2016.07.006).
- 824 49. A. Ntranos, P. Casaccia, Bromodomains: Translating the words of lysine acetylation into  
825 myelin injury and repair. *Neurosci Lett* **625**, 4-10 (2016); published online EpubJun 20  
826 (10.1016/j.neulet.2015.10.015).
- 827 50. T. L. Wood, K. K. Bercury, S. E. Cifelli, L. E. Mursch, J. Min, J. Dai, W. B. Macklin, mTOR: a link  
828 from the extracellular milieu to transcriptional regulation of oligodendrocyte development.  
829 *ASN neuro* **5**, e00108; published online EpubMar 19 (AN20120092 [pii]  
830 10.1042/AN20120092).
- 831 51. G. Williams, A searchable cross-platform gene expression database reveals connections  
832 between drug treatments and disease. *BMC genomics* **13**, 12 (2012)10.1186/1471-2164-13-  
833 12).
- 834 52. O. Basak, T. G. Krieger, M. J. Muraro, K. Wiebrands, D. E. Stange, J. Frias-Aldeguer, N. C.  
835 Rivron, M. van de Wetering, J. H. van Es, A. van Oudenaarden, B. D. Simons, H. Clevers, Troy+  
836 brain stem cells cycle through quiescence and regulate their number by sensing niche  
837 occupancy. *Proc Natl Acad Sci U S A* **115**, E610-E619 (2018); published online EpubJan 23  
838 (10.1073/pnas.1715911114).
- 839 53. M. V. Kuleshov, M. R. Jones, A. D. Rouillard, N. F. Fernandez, Q. Duan, Z. Wang, S. Koplev, S.  
840 L. Jenkins, K. M. Jagodnik, A. Lachmann, M. G. McDermott, C. D. Monteiro, G. W. Gundersen,

- 841 A. Ma'ayan, Enrichr: a comprehensive gene set enrichment analysis web server 2016 update.  
842 *Nucleic acids research* **44**, W90-97 (2016); published online EpubJul 8 (10.1093/nar/gkw377).  
843 54. M. M. A. de Almeida, F. Pieropan, L. de Mattos Oliveira, M. C. Dos Santos Junior, J. M. David,  
844 J. P. David, V. D. A. da Silva, C. Dos Santos Souza, S. L. Costa, A. M. Butt, The flavonoid  
845 agathisflavone modulates the microglial neuroinflammatory response and enhances  
846 remyelination. *Pharmacological research* **159**, 104997 (2020); published online EpubJun 11  
847 (10.1016/j.phrs.2020.104997).  
848 55. K. Azim, R. Fiorelli, S. Zweifel, A. Hurtado-Chong, K. Yoshikawa, L. Slomianka, O. Raineteau, 3-  
849 dimensional examination of the adult mouse subventricular zone reveals lineage-specific  
850 microdomains. *PLoS ONE* **7**, e49087 (2012)10.1371/journal.pone.0049087).  
851 56. J. D. Cahoy, B. Emery, A. Kaushal, L. C. Foo, J. L. Zamanian, K. S. Christopherson, Y. Xing, J. L.  
852 Lubischer, P. A. Krieg, S. A. Krupenko, W. J. Thompson, B. A. Barres, A transcriptome  
853 database for astrocytes, neurons, and oligodendrocytes: a new resource for understanding  
854 brain development and function. *J Neurosci* **28**, 264-278 (2008); published online EpubJan 2  
855 (10.1523/JNEUROSCI.4178-07.2008).
- 856
- 857



858 **Acknowledgements**

859 We wish to thank the team of Avi Ma'ayan at the Icahn School of Medicine for  
860 troubleshooting and repair of the LINC's FWD webtool.

861 **Funding**

862 This work was supported by the German Research Council (DFG; AZ/115/1-1/Ve642/1-1),  
863 Swiss National Funds (P300PA\_171224), Multiple Sclerosis Society of the UK (AMB, FP;  
864 Award Reference: 40) and the Biological Sciences Research Council (AMB, ADR; Grant  
865 number: BB/M029379/1), MSCA Seal of Excellence@UNIPD (ADR), FC was supported by  
866 Inneruniversitäre Forschungsförderung of the University Medical Center of Johannes  
867 Gutenberg University Mainz.

868 **Authors' contributions**

869 FP was responsible for the conceptualization, data curation, formal analysis, methodology,  
870 supervision. AR contributed to writing, validation, data curation and data analysis. GW  
871 carried out data curation, analysis, investigation validation, and methodology. FC was  
872 responsible for writing and data analysis. AB was responsible for funding acquisition, project  
873 administration, writing, methodology, supervision and validation. KA for funding acquisition,  
874 investigation, data curation, methodology, project administration, supervision, validation and  
875 writing.

876 **Competing interests**

877 The authors have declared no competing or financial interests.

878 **Data and materials availability**

879 Scripts developed for the first time, Cytoscape files, bulk transcriptomic datasets, gene lists  
880 and raw data's of this study will be placed in Github upon acceptance and a temporary link  
881 provided in the methods section.

882

883

884

885

886

887 **Figure and Legends**

888 **Fig. 1: Querying the LINCS database for small molecules modulating oligodendroglia**  
 889 **and insights into their cellular mechanisms of action.**

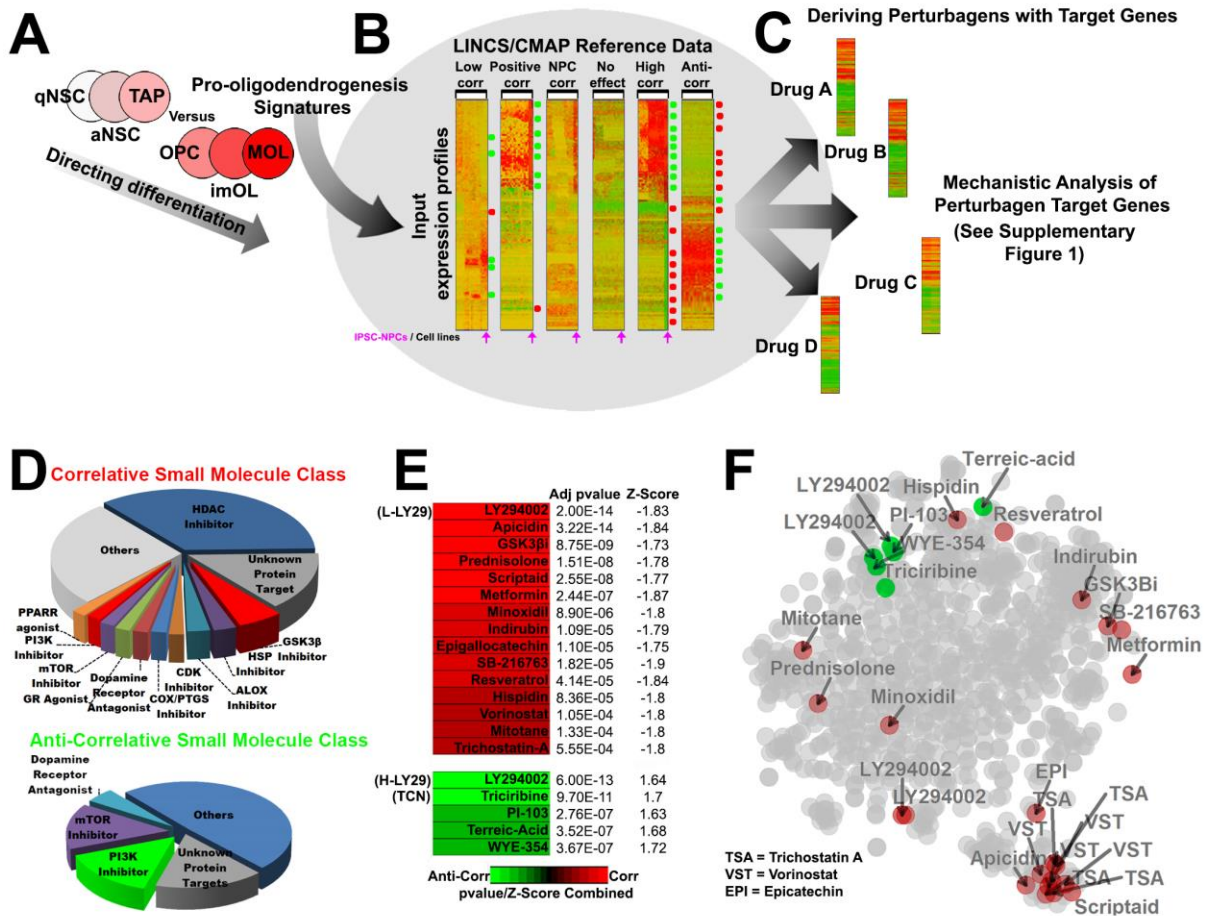

890 (A,B) Transcriptional signatures of early and late OL lineage stages are used to query the  
 891 LINCS database, which contains drug-induced expression profiles for over 20,000 small  
 892 molecules assayed in over 90 cells lines. To focus on the most OL-relevant data, only LINCS  
 893 datasets comprising IPSCs-NSCs were queried. (C) Matching small molecule target genes  
 894 (TGs) are extracted for subsequent mechanistic investigations. (D) The broader mechanisms  
 895 of action/target proteins of the highest ranked small molecules. (E) Heatmap output of the  
 896 top ranking small molecules predicted to enhance (red) or inhibit (green) myelination, sorted  
 897 by their adjusted (adj) pvalues, coloured by their combined pvalue/z-score (correlation in  
 898 input profiles with the profiles induced by IPSCs-NSCs within the database). Small  
 899 molecules tested are abbreviated in brackets. (F) tSNE plot illustrating the  
 900 distance/similarities in TGs induced by top ranking oligodendroglial perturbing small  
 901 molecules. Note the distance between LY-294002 TGs (LY-29) for the higher (green) and  
 902 lower (red) concentrations.

903 Fig. 2: Concentration-dependent effects of LINC-derived small molecules on  
 904 oligodendroglia in the periventricular forebrain.

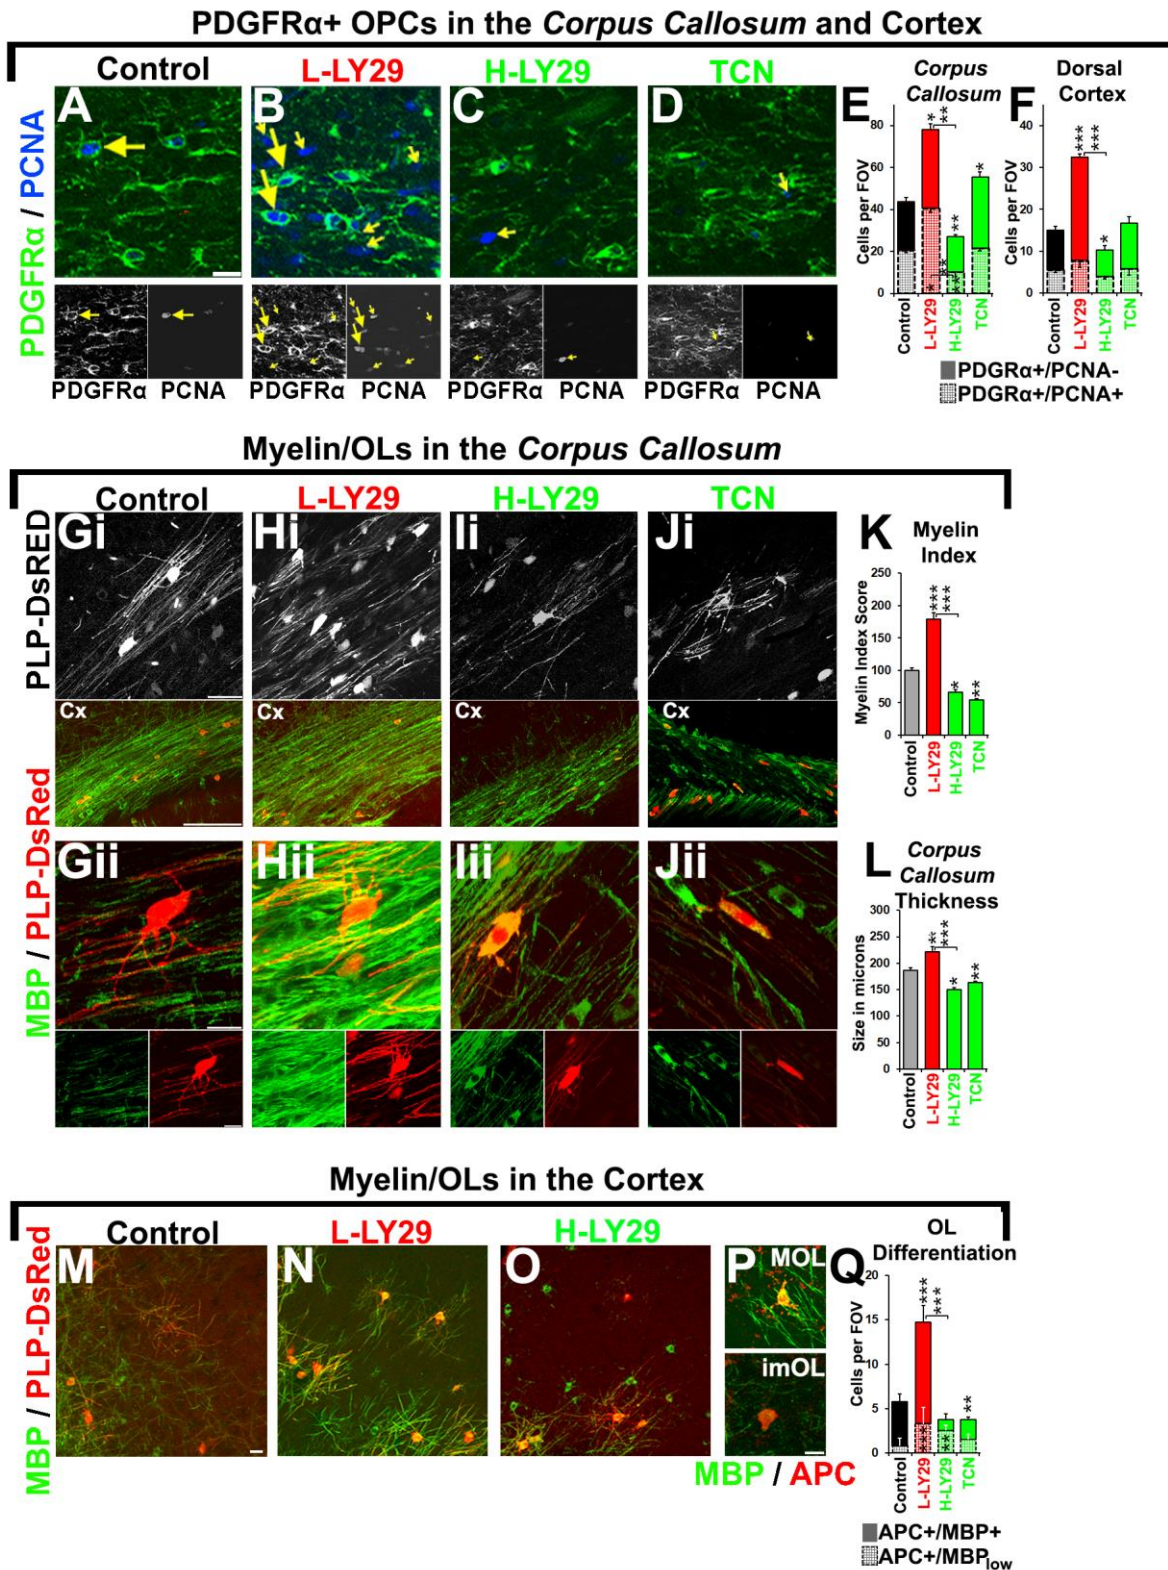

905

906 Transgenic PLP-DsRed and wildtype P8 mice treated with saline/DMSO as controls, LY-29  
 907 and TCN by infusion into the lateral ventricle for 3 days and analysed at P11.

908 Immunostaining done for PDGFR $\alpha$  for OPCs, PCNA for cells in S-phase and MBP for  
909 myelin. **(A-F)** Examination/quantification of OPCs in the corpus callosum and cortex and  
910 their cell cycle states and quantifications in E. Arrows exemplify PDGFR $\alpha$ + /PCNA+ OPCs  
911 and small arrows are PDGFR $\alpha$ - /PCNA+ pre-OPC. Scale bars = 20  $\mu$ m. **(G-L)** Top panels,  
912 middle and lower panels with captions show respectively single z-planes of PLP-DsRed+  
913 myelin sheaths/MYOL, overview of the corpus callosum via MBP immunostainings and  
914 higher power cropped confocal sections. Morphologies of OLs induced by L-LY-29  
915 supported further myelin sheaths compared to controls, but OLs appeared abnormal and did  
916 not support myelin sheaths in H-LY-29 and TCN. Scale bars = 20  $\mu$ m in top panels, 150  $\mu$ m  
917 in the corpus callosum overviews and 10  $\mu$ m in Gii. **(M-Q)** Determination of imOLs and  
918 MYOLs densities in the cortex where individual stages of OL units are resolvable as  
919 exemplified in P and quantified in Q (n = 4). Flattened confocal z-sections are of 20  $\mu$ m  
920 thickness. Scale bar = 20  $\mu$ m in M and 10  $\mu$ m in P. In histograms of (E) to (Q), data are  
921 mean + SEM quantifications in each region in a constant volume in the case of cell counts  
922 (fields of view: FOV); n $\geq$ 4 animals and each n number represents 3 brain averaged per  
923 mouse (\*\*p<0.001, \*\*, p < .01, \*, p < .05; t-test). Quantification of myelin index in K or  
924 corpus callosum thickness in L are averaged numbers from n = 4 mice (3-4 brain sections  
925 per mice) per condition with error bars in SEM. Bonferroni's posthoc test used to reveal  
926 statistically significant differences between the two concentrations of LY-29 and controls.

927

928

929

930

931

932

933

934

935

936

937



938 **Fig. 3: LINCS-derived small molecules differentially modulate oligodendrogenesis.**

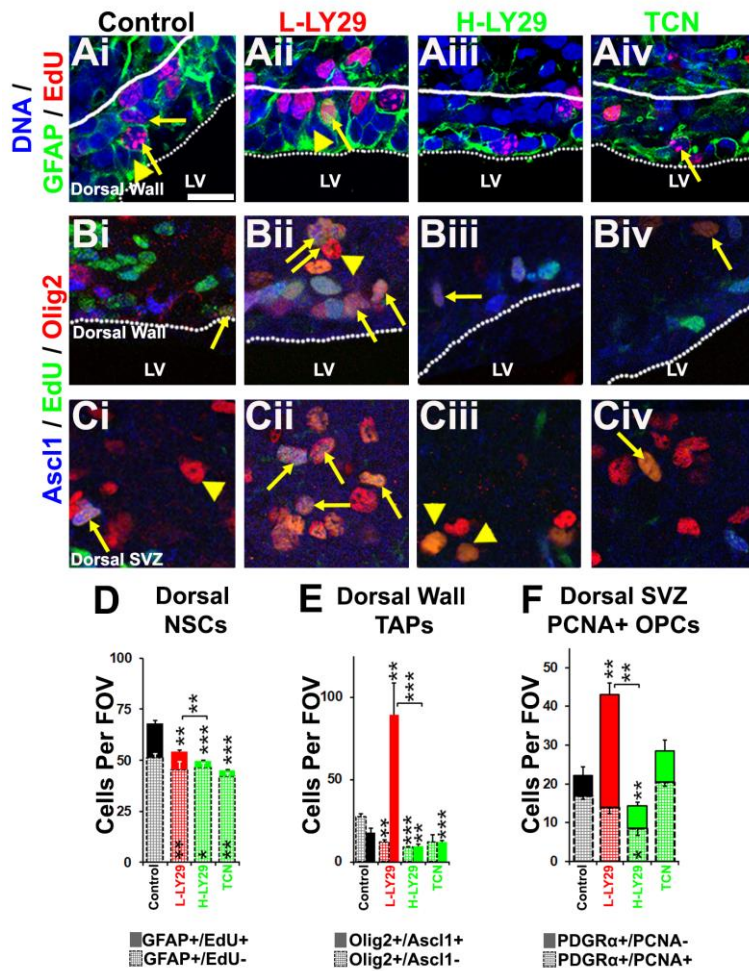

939

940 P8 wildtype mice were treated with control (saline/DMSO), LY-29 or TCN by infusion into the  
 941 lateral ventricle for 3 days and periventricular/SVZ tissue analysed at P11. EdU was given at  
 942 P9 and P10 by i.p. injections for aiding lineage progression/proliferative cell quantifications in  
 943 the SVZ. Scale bar = 20  $\mu$ ms. (A) GFAP (and staining for EdU for cells that cycled during  
 944 treatment) for identification of NSCs adjacent to the dorsal ventricular wall. Arrows and  
 945 arrowheads exemplify NSCs which cycled during treatment and remained quiescent,  
 946 respectively. Scale bar = 20 microns for micrographs A-C. (B,C) Ascl1 and Olig2 for  
 947 immunolabelling of TAPs and OL lineage cells, respectively, and cells examined directly  
 948 close to the dorsal wall in B and 70 micron space between the ependymal layer and  
 949 developing corpus callosum. Arrows and arrowheads exemplify TAPs committed to the  
 950 oligodendrocytes and OPCs, respectively (Ascl1-/EdU+/Olig2+). (D to F) Quantification of  
 951 dorsal NSCs (D), TAPs (E) and OPCs (E) in the dorsal SVZ tissue and data are mean +  
 952 SEM in a constant volume (fields of view: FOV);  $n \geq 4$  animals (\*\* $p < 0.001$ , \*\* $p < .01$ , \* $p < .05$   
 953  $t$ -test/ANOVA where appropriate).

954 **Fig. 4: Unravelling of the L-LY29 induced genes in the adult optic nerve and resolving**  
 955 **OPC/MYOL cellular networks.**

**A Overview of the global transcriptomic changes of the adult optic nerve treated with L-LY-29**

Pathways Adj p-value <5e-05

- [Focal Adhesion WP85](#)
- [Wnt Signaling NetPath WP539](#)
- [Ras Signaling WP472](#)
- [FAK-P13N-Akt/mTOR signaling WP2841](#)
- [EGF signaling WP387](#)
- [Phosphatidylinositol 3-OH kinase signaling WP1763](#)
- [Splicing factor NOVA regulated synaptic proteins WP1983](#)
- [EGFR signaling WP572](#)
- [Insulin Signaling WP65](#)
- [L2 Signaling WP450](#)

Biological Processes (BPs) Adj p-value <5.5e-05

- [Regulation of cell migration \(GO:0030334\)](#)
- [Retrograde vesicle-mediated transport, Golgi to ER \(GO:0006890\)](#)
- [Protein phosphorylation \(GO:0006468\)](#)
- [Mitotic cell cycle phase transition \(GO:0044772\)](#)
- [Axon guidance \(GO:0007411\)](#)
- [Regulation of cytoskeleton organization \(GO:0051493\)](#)
- [Positive regulation of cell migration \(GO:0030335\)](#)
- [STAT cascade \(GO:0097696\)](#)
- [Vascular endothelial growth factor receptor signaling pathway \(GO:0048010\)](#)
- [Vesicle-mediated transport \(GO:0016192\)](#)

**Neighbourhood-based entities set (NEST) exploration of key BPs altered in OPCs/MYOLs via L-LY-29**

**B OPC-enriched signalling-to-transcriptional networks**

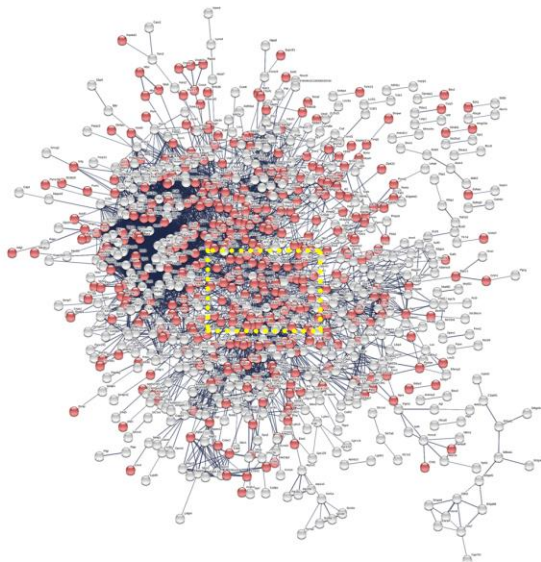

**OPC Hub nodes**

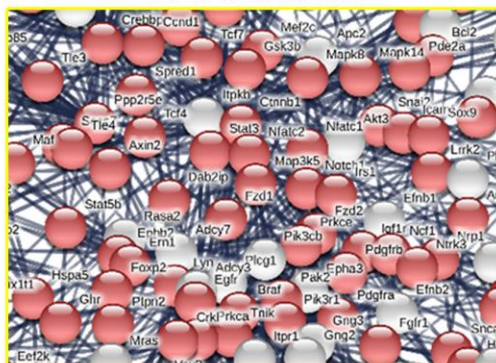

**C MYOL-enriched signalling and metabolic machineries**

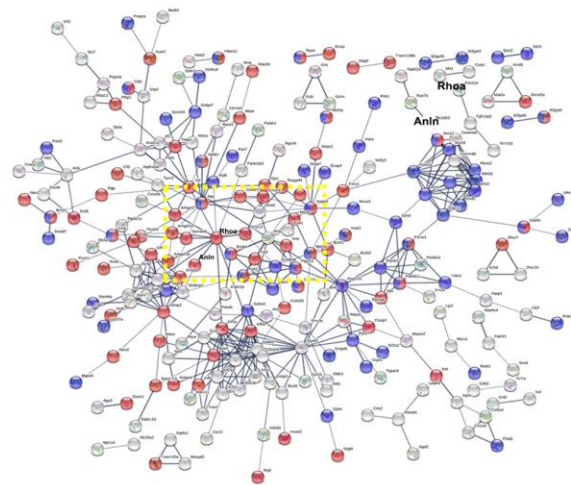

**MYOL Hub nodes**

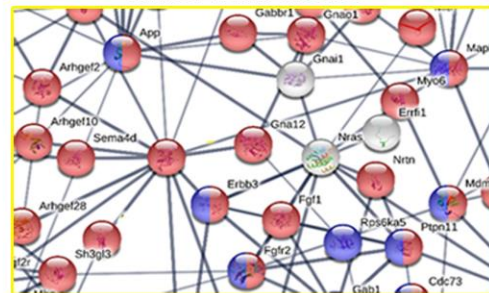

956

957 (A) Significantly differentially expressed transcripts induced by (see also Fig S4H) L-LY29 in  
 958 the adult optic nerve were inspected for signalling pathways and BP alterations, using the  
 959 webtool enrichr. The top 10 are presented and ranked by their adjusted (Adj) p-values. (B,C)  
 960 Neighbourhood-based entities set analysis (NEST) of OPC- and MYOL-enriched genes



961 identified by STRING networks for predicted protein–protein interactions (circled in red).  
962 Central nodes were cropped and expanded to highlight the essential upstream factors  
963 regulated by L-LY29 and nodes are coloured as per key BPs (see corresponding results  
964 section for the BPs represented in coloured nodes).

965

966

967

968

969

970

971

972

973

974

975

976

977

978

979

980

981

982

983

984

985

986 **Fig. 5: Validation and confirmation of signalling network alterations caused by L-LY29**  
 987 **by phosphoprotein immunoassay.**

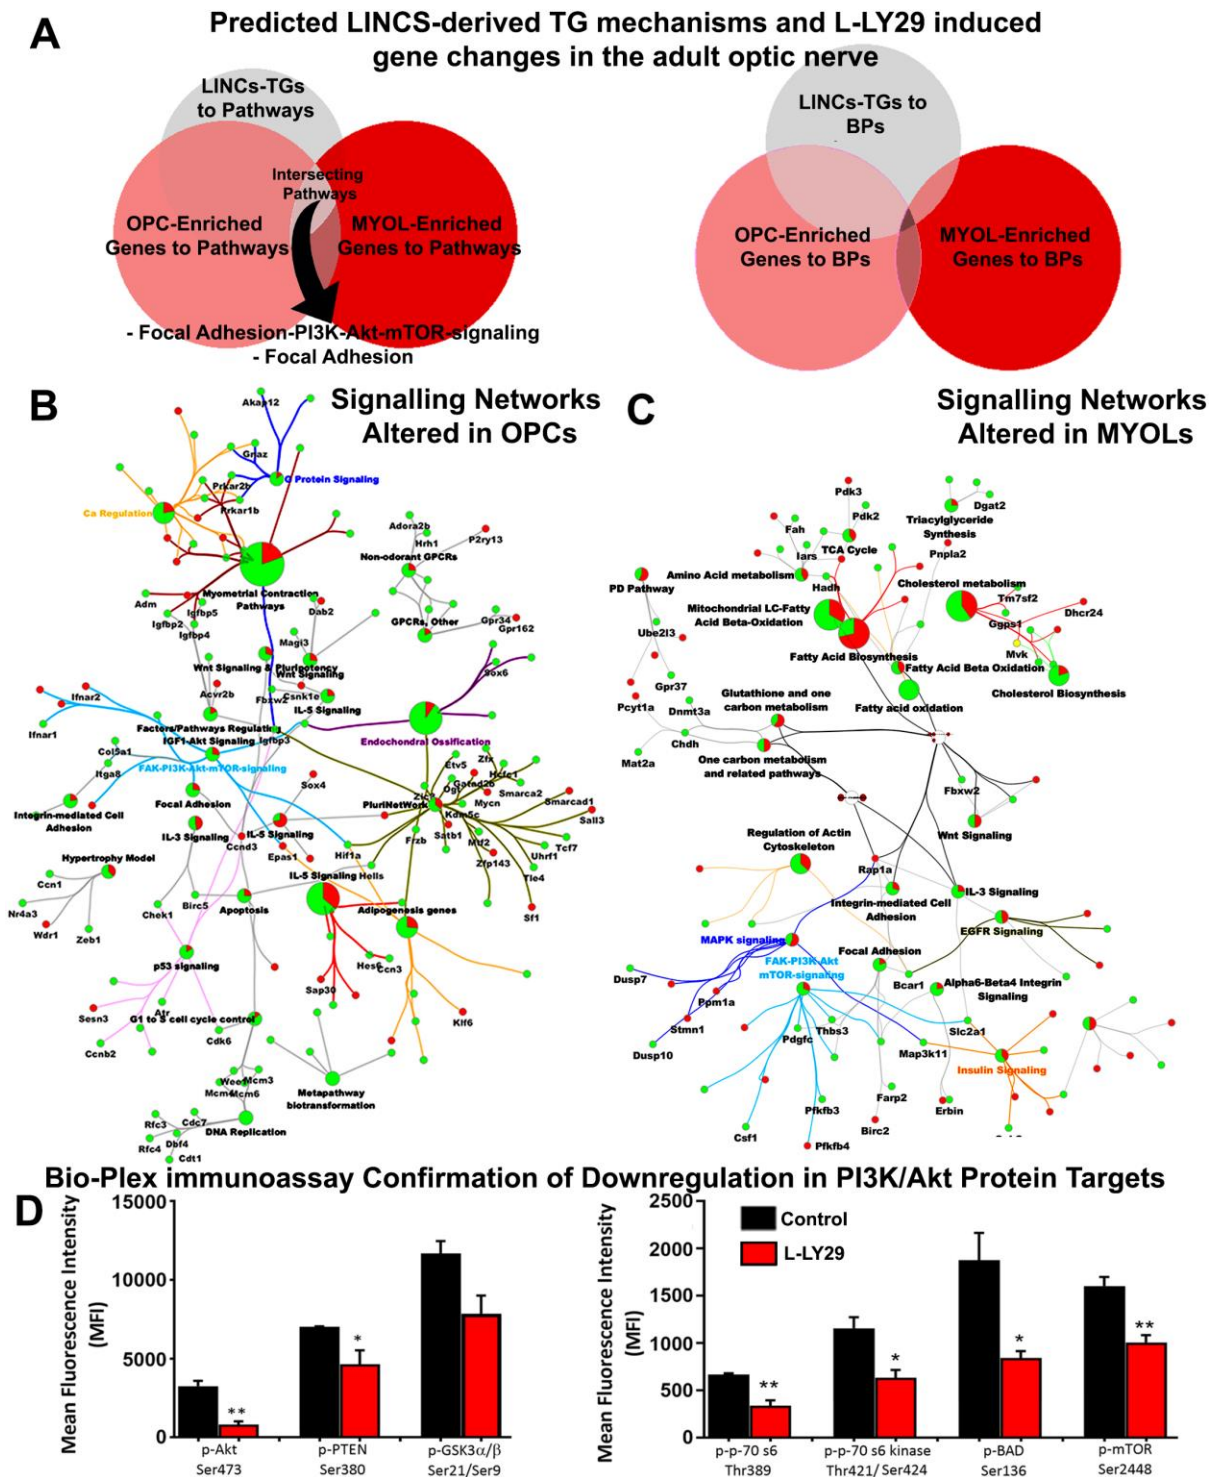

988  
 989 (A) Comparison of LINC-derived TGs processed by Enrichr to identify signalling pathway  
 990 and BP alterations at two OL lineage stages (OPC-enriched profiles and MYOL-enriched  
 991 profiles) following L-LY29 treatment of the optic nerve. (B,C) Cluego signalling pathway  
 992 networks of changes in defined stages of OL differentiation. Nodes in red or green represent

993 those that are respectively upregulated or downregulated upon L-LY29. **(D)** Cerebellar slices  
994 from P11 mice were maintained in culture for 3 DIV in control medium or medium containing  
995 0.5  $\mu$ M LY29 and phosphoproteins were assessed by Bio-Plex immunoassay. Data are  
996 mean + SEM (n=3 per each group) fluorescence intensity (MFI). phospho-Akt (Ser473),  
997 phospho-PTEN (Ser380) and phospho-GSK $\alpha/\beta$  (Ser21/Ser9); \*p<0.05, \*\*p<0.01, two-tailed  
998 unpaired t-test.

999

1000

1001

1002

1003

1004

1005

1006

1007

1008

1009

1010

1011

1012

1013

1014

1015

1016

1017
